# Supplementary material for: Environment and host species shape the skin microbiome of captive neotropical bats
Source: PeerJ. 2016 Sep 20;4:e2430. doi: 10.7717/peerj.2430 (PMC5036103; doi:10.7717/peerj.2430)
Supplement: Table S2 [file peerj-04-2430-s003.xlsx]

## Sheet: Phyla level
	AjBiodôme	AjZoo	CpBiodôme
k__Bacteria;p__Actinobacteria	0.41712	0.20875	0.394135
k__Bacteria;p__Proteobacteria	0.265854	0.303033	0.356358
k__Bacteria;p__Firmicutes	0.166324	0.24285	0.11295
k__Bacteria;p__Cyanobacteria	0.122057	0.174439	0.0897431
k__Bacteria;p__Bacteroidetes	0.0116149	0.0333054	0.0201744
k__Bacteria;p__Fusobacteria	0.0120256	0.00896238	0.0130546
k__Bacteria;p__TM7	0.00126402	0.00408443	0.00527421
k__Archaea;p__Euryarchaeota	0.00148752	0.00010276	0.00262174
Unassigned;Other	0.00102683	0.00633161	0.00169116
k__Bacteria;p__Tenericutes	0.00034337	0.000954293	0.000743941
k__Bacteria;p__GN02	5.187e-05	3.34715e-05	0.000725985
k__Bacteria;p__Chloroflexi	0.00031819	0.00198522	0.000689852
k__Bacteria;p__Verrucomicrobia	0.00021629	0.000676922	0.00068167
k__Bacteria;p__[Thermi]	0	0.00519148	0.000415272
k__Bacteria;p__Acidobacteria	1.926e-05	0.00493026	0.000184856
k__Bacteria;p__Lentisphaerae	0.00011267	6.6872e-06	0.000142981
k__Bacteria;p__FBP	0	0.000716817	0.000128249
k__Bacteria;p__Planctomycetes	0.0001197	0.00116652	0.000123774
k__Bacteria;p__Armatimonadetes	1.674e-05	0.000846244	8.8219e-05
k__Bacteria;p__Fibrobacteres	0	1.21109e-05	4.37279e-05
k__Archaea;p__Crenarchaeota	0	3.12108e-05	2.04725e-05
k__Bacteria;p__Gemmatimonadetes	0	0.000497401	8.3887e-06
k__Bacteria;p__Spirochaetes	1.129e-05	0.000305727	0
k__Bacteria;p__BRC1	0	0.000232422	0
k__Bacteria;p__Chlamydiae	0	0.000227244	0
k__Bacteria;p__Chlorobi	0	0.000132187	0
k__Bacteria;p__Synergistetes	1.674e-05	9.92914e-05	0
k__Bacteria;p__Elusimicrobia	0	9.26418e-05	0
k__Bacteria;p__TM6	0	2.55323e-06	0

## Sheet: Class level
	AjBiodôme	AjZoo	CpBiodôme
k__Bacteria;p__Firmicutes;c__Bacilli	0.149126	0.242861	0.113566
k__Bacteria;p__Actinobacteria;c__Actinobacteria	0.413216	0.197714	0.361405
k__Bacteria;p__Cyanobacteria;c__Chloroplast	0.12138	0.165905	0.0894611
k__Bacteria;p__Proteobacteria;c__Betaproteobacteria	0.0910366	0.136215	0.16351
k__Bacteria;p__Proteobacteria;c__Gammaproteobacteria	0.152683	0.0715909	0.18037
k__Bacteria;p__Proteobacteria;c__Alphaproteobacteria	0.0203856	0.0616857	0.0232257
k__Bacteria;p__Firmicutes;c__Clostridia	0.0216254	0.0273098	0.0158772
k__Bacteria;p__Proteobacteria;c__Epsilonproteobacteria	0.000147881	0.0194615	0.000256247
k__Bacteria;p__Bacteroidetes;c__Flavobacteriia	0.00481568	0.0118258	0.00962261
k__Bacteria;p__Fusobacteria;c__Fusobacteriia	0.0119089	0.00863924	0.0126798
k__Bacteria;p__Bacteroidetes;c__Bacteroidia	0.0057971	0.00687079	0.00824283
Unassigned;Other;Other	0.00102414	0.00617322	0.00162146
k__Bacteria;p__[Thermi];c__Deinococci	0	0.00505696	0.000376611
k__Bacteria;p__Bacteroidetes;c__Cytophagia	0.000180835	0.00502998	0.00137529
k__Bacteria;p__Bacteroidetes;c__Sphingobacteriia	0.000699349	0.00420003	0.000540213
k__Bacteria;p__Bacteroidetes;c__[Saprospirae]	6.26313e-06	0.00407223	0.000231795
k__Bacteria;p__Acidobacteria;c__[Chloracidobacteria]	1.92086e-05	0.00402545	0.000168603
k__Bacteria;p__TM7;c__TM7-3	0.00125683	0.00372982	0.00483964
k__Bacteria;p__Proteobacteria;c__Deltaproteobacteria	8.53168e-05	0.00350694	0.000606404
k__Bacteria;p__Actinobacteria;c__Thermoleophilia	1.35749e-05	0.0019669	0.000199234
k__Bacteria;p__Actinobacteria;c__Acidimicrobiia	0	0.00156142	0.000168948
k__Bacteria;p__Chloroflexi;c__Thermomicrobia	0.000283606	0.00113406	0.000535177
k__Bacteria;p__Planctomycetes;c__Planctomycetia	2.30531e-05	0.00103524	6.18442e-05
k__Bacteria;p__Tenericutes;c__Mollicutes	0.000337713	0.000920493	0.000678176
k__Bacteria;p__FBP;c__	0	0.000698226	0.000116283
k__Bacteria;p__Firmicutes;c__Erysipelotrichi	0.000321004	0.000648615	0.000542364
k__Bacteria;p__Acidobacteria;c__Acidobacteria-6	0	0.000577684	0
k__Bacteria;p__Armatimonadetes;c__Armatimonadia	1.65481e-05	0.00051856	7.78138e-05
k__Bacteria;p__Spirochaetes;c__Spirochaetes	1.12543e-05	0.000283423	0
k__Bacteria;p__Armatimonadetes;c__[Fimbriimonadia]	0	0.000282952	0
k__Bacteria;p__Chloroflexi;c__Anaerolineae	3.30961e-05	0.00028116	9.12886e-05
k__Bacteria;p__Gemmatimonadetes;c__Gemmatimonadetes	0	0.000265534	0
k__Bacteria;p__Chloroflexi;c__Chloroflexi	0	0.000262886	0
k__Bacteria;p__Verrucomicrobia;c__Verrucomicrobiae	0.000158955	0.000261738	0.000305561
k__Bacteria;p__Actinobacteria;c__Coriobacteriia	0.000152589	0.000243331	9.68915e-05
k__Bacteria;p__Cyanobacteria;c__4C0d-2	2.78378e-05	0.000234193	1.84623e-05
k__Bacteria;p__TM7;c__TM7-1	0	0.000232996	3.05827e-05
k__Bacteria;p__BRC1;c__PRR-11	0	0.000229107	0
k__Bacteria;p__Chlamydiae;c__Chlamydiia	0	0.000213228	0
k__Bacteria;p__Verrucomicrobia;c__Verruco-5	5.12825e-05	0.000196915	0.000161991
k__Bacteria;p__Cyanobacteria;c__ML635J-21	0	0.000193678	0
k__Bacteria;p__Gemmatimonadetes;c__Gemm-1	0	0.000155065	0
k__Bacteria;p__Chlorobi;c__OPB56	0	0.000130313	0
k__Bacteria;p__Verrucomicrobia;c__[Spartobacteria]	3.65591e-06	0.000129024	0.000134575
k__Bacteria;p__Bacteroidetes;c__[Rhodothermi]	0	0.000121408	0
k__Bacteria;p__Cyanobacteria;c__Oscillatoriophycideae	0	0.000108599	0
k__Archaea;p__Euryarchaeota;c__Methanobacteria	2.0204e-05	9.85188e-05	1.68768e-05
k__Bacteria;p__Chloroflexi;c__C0119	0	9.66587e-05	0
k__Bacteria;p__Synergistetes;c__Synergistia	1.65481e-05	9.63499e-05	0
k__Bacteria;p__Chloroflexi;c__Ellin6529	0	9.25212e-05	0
k__Bacteria;p__Elusimicrobia;c__Elusimicrobia	0	9.00773e-05	0
k__Bacteria;p__Acidobacteria;c__Acidobacteria-5	0	6.95787e-05	0
k__Bacteria;p__Cyanobacteria;c__Synechococcophycideae	0	5.33197e-05	0
k__Bacteria;p__Gemmatimonadetes;c__Gemm-5	0	5.16281e-05	0
k__Bacteria;p__Chloroflexi;c__Gitt-GS-136	0	4.88535e-05	0
k__Bacteria;p__Acidobacteria;c__Sva0725	0	4.40268e-05	0
k__Bacteria;p__Acidobacteria;c__Solibacteres	0	4.35906e-05	0
k__Bacteria;p__Actinobacteria;c__Rubrobacteria	0.000551483	4.18454e-05	0.0045666
k__Bacteria;p__Planctomycetes;c__Phycisphaerae	9.47502e-05	3.85009e-05	0
k__Bacteria;p__Verrucomicrobia;c__Opitutae	0	3.74059e-05	1.29582e-05
k__Bacteria;p__GN02;c__BD1-5	5.17334e-05	3.28595e-05	0.000704049
k__Bacteria;p__Bacteroidetes;c__VC2_1_Bac22	0	3.27329e-05	0
k__Archaea;p__Crenarchaeota;c__Thaumarchaeota	0	3.05036e-05	1.86616e-05
k__Bacteria;p__Verrucomicrobia;c__[Pedosphaerae]	0	2.97572e-05	0
k__Bacteria;p__Cyanobacteria;c__Nostocophycideae	0	2.76384e-05	0
k__Bacteria;p__Actinobacteria;c__MB-A2-108	0	2.29941e-05	0
k__Bacteria;p__Armatimonadetes;c__0319-6E2	0	1.92827e-05	0
k__Bacteria;p__Acidobacteria;c__iii1-8	0	1.8539e-05	0
k__Bacteria;p__Planctomycetes;c__C6	0	1.68621e-05	0
k__Bacteria;p__Planctomycetes;c__OM190	0	1.67183e-05	0
k__Bacteria;p__Gemmatimonadetes;c__Gemm-3	0	1.66333e-05	6.72699e-06
k__Bacteria;p__Acidobacteria;c__Acidobacteriia	0	1.48786e-05	0
k__Bacteria;p__TM7;c__MJK10	0	1.433e-05	0
k__Bacteria;p__Fibrobacteres;c__Fibrobacteria	0	1.19416e-05	3.91225e-05
k__Bacteria;p__TM7;c__SC3	0	1.09798e-05	0
k__Bacteria;p__Chloroflexi;c__TK17	0	7.52202e-06	0
k__Bacteria;p__Lentisphaerae;c__[Lentisphaeria]	0.000110649	6.58966e-06	0.000128663
k__Bacteria;p__Tenericutes;c__RF3	0	2.5428e-06	8.52553e-05
k__Bacteria;p__TM6;c__SJA-4	0	2.5428e-06	0
k__Archaea;p__Euryarchaeota;c__Halobacteria	0.00145946	0	0.00236064
k__Bacteria;p__Actinobacteria;c__Nitriliruptoria	0.000866981	0	0.000774837
k__Bacteria;p__Planctomycetes;c__vadinHA49	0	0	5.101e-05
k__Archaea;p__Euryarchaeota;c__Methanomicrobia	0	0	3.86483e-05
k__Bacteria;p__Armatimonadetes;c__SJA-176	0	0	0
k__Bacteria;p__Proteobacteria;c__TA18	0	0	0

## Sheet: Order level
	AjBiodôme	AjZoo	CpBiodôme
k__Bacteria;p__Actinobacteria;c__Actinobacteria;o__Actinomycetales	0.414706	0.203028	0.371709
k__Bacteria;p__Cyanobacteria;c__Chloroplast;o__Streptophyta	0.122005	0.173187	0.0910586
k__Bacteria;p__Firmicutes;c__Bacilli;o__Lactobacillales	0.0968299	0.175965	0.0665178
k__Bacteria;p__Proteobacteria;c__Gammaproteobacteria;o__Pseudomonadales	0.0669468	0.0102781	0.0515922
k__Bacteria;p__Proteobacteria;c__Betaproteobacteria;o__Neisseriales	0.0656176	0.072442	0.111173
k__Bacteria;p__Proteobacteria;c__Gammaproteobacteria;o__Enterobacteriales	0.0572936	0.0196241	0.0865797
k__Bacteria;p__Firmicutes;c__Bacilli;o__Bacillales	0.0453411	0.0357219	0.0254319
k__Bacteria;p__Proteobacteria;c__Betaproteobacteria;o__Burkholderiales	0.0259916	0.0632189	0.0551138
k__Bacteria;p__Firmicutes;c__Clostridia;o__Clostridiales	0.0218722	0.0282903	0.0162193
k__Bacteria;p__Proteobacteria;c__Gammaproteobacteria;o__Pasteurellales	0.0181841	0.0316485	0.0339597
k__Bacteria;p__Proteobacteria;c__Alphaproteobacteria;o__Rickettsiales	0.017715	0.0138932	0.0089395
k__Bacteria;p__Fusobacteria;c__Fusobacteriia;o__Fusobacteriales	0.0120256	0.00896238	0.0129015
k__Bacteria;p__Proteobacteria;c__Gammaproteobacteria;o__Alteromonadales	0.00878966	0.000298257	0.00158777
k__Bacteria;p__Bacteroidetes;c__Bacteroidia;o__Bacteroidales	0.0058722	0.00720223	0.00843864
k__Bacteria;p__Bacteroidetes;c__Flavobacteriia;o__Flavobacteriales	0.0048505	0.0122223	0.00978083
k__Bacteria;p__Firmicutes;c__Bacilli;o__Gemellales	0.00195463	0.00216385	0.000774772
k__Bacteria;p__Proteobacteria;c__Gammaproteobacteria;o__Cardiobacteriales	0.00161894	0.00267455	0.00804826
k__Bacteria;p__Proteobacteria;c__Alphaproteobacteria;o__Sphingomonadales	0.00147228	0.0171609	0.00817645
k__Archaea;p__Euryarchaeota;c__Halobacteria;o__Halobacteriales	0.00146712	0	0.00242377
Unassigned;Other;Other;Other	0.00102683	0.00633161	0.00165382
k__Bacteria;p__Actinobacteria;c__Actinobacteria;o__Bifidobacteriales	0.000812441	0.00173486	0.000649772
k__Bacteria;p__Bacteroidetes;c__Sphingobacteriia;o__Sphingobacteriales	0.000702888	0.00431621	0.000548798
k__Bacteria;p__TM7;c__TM7-3;o__	0.000677544	0.00268129	0.00430281
k__Bacteria;p__Proteobacteria;c__Alphaproteobacteria;o__Rhodobacterales	0.000620577	0.016523	0.00235541
k__Bacteria;p__Actinobacteria;c__Nitriliruptoria;o__Nitriliruptorales	0.000614739	0	0.000459357
k__Bacteria;p__TM7;c__TM7-3;o__CW040	0.000586476	0.000103869	0.000600226
k__Bacteria;p__Actinobacteria;c__Rubrobacteria;o__Rubrobacterales	0.000558403	4.24344e-05	0.00466473
k__Bacteria;p__Proteobacteria;c__Alphaproteobacteria;o__Rhizobiales	0.000468025	0.011683	0.00161908
k__Bacteria;p__Firmicutes;c__Erysipelotrichi;o__Erysipelotrichales	0.000326152	0.000668488	0.000549467
k__Bacteria;p__Actinobacteria;c__Nitriliruptoria;o__Euzebyales	0.00025998	0	0.000329003
k__Bacteria;p__Tenericutes;c__Mollicutes;o__RF39	0.00025271	0.000101537	0.000324533
k__Bacteria;p__Proteobacteria;c__Gammaproteobacteria;o__Salinisphaerales	0.000248524	0	0.00072213
k__Bacteria;p__Chloroflexi;c__Thermomicrobia;o__JG30-KF-CM45	0.00022759	0.00117392	0.000534498
k__Bacteria;p__Bacteroidetes;c__Cytophagia;o__Cytophagales	0.000183016	0.00519795	0.00140208
k__Bacteria;p__Proteobacteria;c__Gammaproteobacteria;o__Oceanospirillales	0.000182857	0	0
k__Bacteria;p__Verrucomicrobia;c__Verrucomicrobiae;o__Verrucomicrobiales	0.000161104	0.000273634	0.000310054
k__Bacteria;p__Actinobacteria;c__Coriobacteriia;o__Coriobacteriales	0.000154316	0.000249445	9.83202e-05
k__Bacteria;p__Proteobacteria;c__Epsilonproteobacteria;o__Campylobacterales	0.000149071	0.0200664	0.000265341
k__Bacteria;p__Proteobacteria;c__Alphaproteobacteria;o__Rhodospirillales	0.000142404	0.0024946	0.00193203
k__Bacteria;p__Proteobacteria;c__Betaproteobacteria;o__Rhodocyclales	0.000127548	0.000629878	1.73848e-05
k__Bacteria;p__Lentisphaerae;c__[Lentisphaeria];o__Victivallales	0.000112669	6.6872e-06	0.000131983
k__Bacteria;p__Proteobacteria;c__Gammaproteobacteria;o__Xanthomonadales	0.000112378	0.00858967	0.00109046
k__Bacteria;p__Planctomycetes;c__Phycisphaerae;o__Phycisphaerales	9.13659e-05	1.48504e-05	0
k__Bacteria;p__Tenericutes;c__Mollicutes;o__Mycoplasmatales	6.44093e-05	0.000850203	1.54868e-05
k__Bacteria;p__Proteobacteria;c__Alphaproteobacteria;o__Caulobacterales	6.18007e-05	0.00150549	0.000633418
k__Bacteria;p__Chloroflexi;c__Thermomicrobia;o__	5.71256e-05	0	9.35121e-06
k__Bacteria;p__GN02;c__BD1-5;o__	5.18657e-05	3.34715e-05	0.000713784
k__Bacteria;p__Verrucomicrobia;c__Verruco-5;o__WCHB1-41	5.15278e-05	0.000203473	0.000167783
k__Bacteria;p__Proteobacteria;c__Deltaproteobacteria;o__FAC87	4.94167e-05	0	0.000277492
k__Bacteria;p__Chloroflexi;c__Anaerolineae;o__SBR1031	3.34784e-05	0.000118634	0
k__Bacteria;p__Proteobacteria;c__Deltaproteobacteria;o__Desulfovibrionales	3.07057e-05	0.000413903	0.000228189
k__Bacteria;p__Cyanobacteria;c__4C0d-2;o__MLE1-12	2.79304e-05	0.000184687	1.87024e-05
k__Bacteria;p__Tenericutes;c__Mollicutes;o__Anaeroplasmatales	2.62521e-05	0	0.000298029
k__Bacteria;p__Cyanobacteria;c__Chloroplast;o__Stramenopiles	2.45806e-05	0.000179728	0.000180408
k__Bacteria;p__Planctomycetes;c__Planctomycetia;o__Gemmatales	2.31106e-05	0.000609449	2.38424e-05
k__Archaea;p__Euryarchaeota;c__Methanobacteria;o__Methanobacteriales	2.04022e-05	0.00010276	1.70837e-05
k__Bacteria;p__Acidobacteria;c__[Chloracidobacteria];o__RB41	1.92567e-05	0.00407351	0.000170637
k__Bacteria;p__Armatimonadetes;c__Armatimonadia;o__Armatimonadales	1.67392e-05	0.000385847	8.14329e-05
k__Bacteria;p__Synergistetes;c__Synergistia;o__Synergistales	1.67392e-05	9.92914e-05	0
k__Bacteria;p__Spirochaetes;c__Spirochaetes;o__Spirochaetales	1.12892e-05	0.000255549	0
k__Bacteria;p__Actinobacteria;c__Thermoleophilia;o__Solirubrobacterales	1.0989e-05	0.0011909	0.000202613
k__Bacteria;p__Proteobacteria;c__Alphaproteobacteria;o__RF32	9.62835e-06	0	9.44885e-06
k__Bacteria;p__Proteobacteria;c__Betaproteobacteria;o__	7.8376e-06	0.000189079	6.06311e-05
k__Bacteria;p__Bacteroidetes;c__[Saprospirae];o__[Saprospirales]	6.27554e-06	0.00420585	0.00023616
k__Bacteria;p__Proteobacteria;c__Deltaproteobacteria;o__Bdellovibrionales	5.64462e-06	0.000306096	0.000105446
k__Bacteria;p__Proteobacteria;c__Alphaproteobacteria;o__	5.22507e-06	0.000210236	0
k__Bacteria;p__Planctomycetes;c__Phycisphaerae;o__WD2101	5.22507e-06	2.43027e-05	0
k__Bacteria;p__Verrucomicrobia;c__[Spartobacteria];o__[Chthoniobacterales]	3.663e-06	0.000131729	0.000138349
k__Bacteria;p__Proteobacteria;c__Gammaproteobacteria;o__Aeromonadales	2.61253e-06	0.000851766	0.000217169
k__Bacteria;p__Actinobacteria;c__Thermoleophilia;o__Gaiellales	2.61253e-06	0.000845847	0
k__Bacteria;p__[Thermi];c__Deinococci;o__Deinococcales	0	0.00514389	0.000348741
k__Bacteria;p__Proteobacteria;c__Betaproteobacteria;Other	0	0.00388317	3.35869e-05
k__Bacteria;p__Proteobacteria;c__Deltaproteobacteria;o__Myxococcales	0	0.0023726	7.74341e-06
k__Bacteria;p__Actinobacteria;c__Acidimicrobiia;o__Acidimicrobiales	0	0.00163566	0.000172074
k__Bacteria;p__FBP;c__;o__	0	0.000716817	0.000118383
k__Bacteria;p__TM7;c__TM7-3;o__I025	0	0.000715445	0
k__Bacteria;p__Acidobacteria;c__Acidobacteria-6;o__iii1-15	0	0.000616696	0
k__Bacteria;p__Proteobacteria;c__Alphaproteobacteria;o__BD7-3	0	0.000427998	0
k__Bacteria;p__Planctomycetes;c__Planctomycetia;o__Pirellulales	0	0.000336406	3.86626e-05
k__Bacteria;p__TM7;c__TM7-3;o__EW055	0	0.000319589	0
k__Bacteria;p__Cyanobacteria;c__Chloroplast;o__Chlorophyta	0	0.000304513	0
k__Bacteria;p__Armatimonadetes;c__[Fimbriimonadia];o__[Fimbriimonadales]	0	0.000289545	0
k__Bacteria;p__Proteobacteria;c__Betaproteobacteria;o__SC-I-84	0	0.000245583	8.44891e-06
k__Bacteria;p__TM7;c__TM7-1;o__	0	0.000238124	3.09301e-05
k__Bacteria;p__BRC1;c__PRR-11;o__	0	0.000232422	0
k__Bacteria;p__Chlamydiae;c__Chlamydiia;o__Chlamydiales	0	0.000227244	0
k__Bacteria;p__Cyanobacteria;c__ML635J-21;o__	0	0.000204707	0
k__Bacteria;p__Gemmatimonadetes;c__Gemmatimonadetes;o__Gemmatimonadales	0	0.000197979	0
k__Bacteria;p__Proteobacteria;c__Betaproteobacteria;o__Methylophilales	0	0.000172148	0
k__Bacteria;p__Proteobacteria;c__Betaproteobacteria;o__Ellin6067	0	0.000165791	0
k__Bacteria;p__Gemmatimonadetes;c__Gemm-1;o__	0	0.000157642	0
k__Bacteria;p__Armatimonadetes;c__Armatimonadia;o__FW68	0	0.000151354	0
k__Bacteria;p__Proteobacteria;c__Deltaproteobacteria;o__Spirobacillales	0	0.00014898	0
k__Bacteria;p__Planctomycetes;c__Planctomycetia;o__Planctomycetales	0	0.00014742	0
k__Bacteria;p__Proteobacteria;c__Deltaproteobacteria;o__Desulfuromonadales	0	0.000143692	0
k__Bacteria;p__Proteobacteria;c__Deltaproteobacteria;o__MIZ46	0	0.00014179	0
k__Bacteria;p__Chlorobi;c__OPB56;o__	0	0.000132187	0
k__Bacteria;p__Bacteroidetes;c__[Rhodothermi];o__[Rhodothermales]	0	0.000127747	0
k__Bacteria;p__Cyanobacteria;c__Chloroplast;o__	0	0.000120194	0
k__Bacteria;p__Chloroflexi;c__Chloroflexi;o__Chloroflexales	0	0.000112608	0
k__Bacteria;p__Cyanobacteria;c__Oscillatoriophycideae;o__Oscillatoriales	0	0.000111047	0
k__Bacteria;p__Proteobacteria;c__Betaproteobacteria;o__ASSO-13	0	0.000110258	0
k__Bacteria;p__Proteobacteria;c__Gammaproteobacteria;o__Vibrionales	0	0.000108384	0
k__Bacteria;p__Proteobacteria;c__Betaproteobacteria;o__Procabacteriales	0	0.00010087	0
k__Bacteria;p__Proteobacteria;c__Betaproteobacteria;o__Hydrogenophilales	0	0.000100146	0
k__Bacteria;p__Chloroflexi;c__C0119;o__	0	9.94948e-05	0
k__Bacteria;p__Chloroflexi;c__Ellin6529;o__	0	9.48226e-05	0
k__Bacteria;p__Elusimicrobia;c__Elusimicrobia;o__Elusimicrobiales	0	7.52678e-05	0
k__Bacteria;p__Chloroflexi;c__Chloroflexi;o__[Roseiflexales]	0	7.42544e-05	0
k__Bacteria;p__Acidobacteria;c__Acidobacteria-5;o__	0	7.1408e-05	0
k__Bacteria;p__Chloroflexi;c__Chloroflexi;o__Herpetosiphonales	0	6.80163e-05	0
k__Bacteria;p__Proteobacteria;c__Deltaproteobacteria;o__Syntrophobacterales	0	6.59525e-05	0
k__Bacteria;p__Cyanobacteria;c__4C0d-2;o__YS2	0	6.41531e-05	0
k__Bacteria;p__Chloroflexi;c__Anaerolineae;o__Ardenscatenales	0	6.30198e-05	0
k__Bacteria;p__Cyanobacteria;c__Synechococcophycideae;o__Pseudanabaenales	0	5.43611e-05	0
k__Bacteria;p__Gemmatimonadetes;c__Gemm-5;o__	0	5.27991e-05	0
k__Bacteria;p__Chloroflexi;c__Gitt-GS-136;o__	0	5.1439e-05	0
k__Bacteria;p__Spirochaetes;c__Spirochaetes;o__Sphaerochaetales	0	5.01786e-05	0
k__Bacteria;p__[Thermi];c__Deinococci;o__Thermales	0	4.75909e-05	3.45871e-05
k__Bacteria;p__Acidobacteria;c__[Chloracidobacteria];o__DS-100	0	4.52564e-05	0
k__Bacteria;p__Acidobacteria;c__Sva0725;o__Sva0725	0	4.47537e-05	0
k__Bacteria;p__Gemmatimonadetes;c__Gemmatimonadetes;o__Ellin5290	0	4.47182e-05	0
k__Bacteria;p__Acidobacteria;c__Solibacteres;o__Solibacterales	0	4.45513e-05	0
k__Bacteria;p__Proteobacteria;c__Alphaproteobacteria;o__Ellin329	0	4.30348e-05	0
k__Bacteria;p__Firmicutes;c__Bacilli;o__Turicibacterales	0	4.12309e-05	0
k__Bacteria;p__Verrucomicrobia;c__Opitutae;o__Opitutales	0	3.79532e-05	1.30483e-05
k__Bacteria;p__Chloroflexi;c__Anaerolineae;o__H39	0	3.6669e-05	9.2938e-05
k__Bacteria;p__Proteobacteria;c__Deltaproteobacteria;o__GMD14H09	0	3.32836e-05	0
k__Bacteria;p__Bacteroidetes;c__VC2_1_Bac22;o__	0	3.31452e-05	0
k__Archaea;p__Crenarchaeota;c__Thaumarchaeota;o__Nitrososphaerales	0	3.12108e-05	1.88977e-05
k__Bacteria;p__Verrucomicrobia;c__[Pedosphaerae];o__[Pedosphaerales]	0	3.0132e-05	0
k__Bacteria;p__Chloroflexi;c__Anaerolineae;o__Anaerolineales	0	2.90662e-05	0
k__Bacteria;p__Chloroflexi;c__Anaerolineae;o__CFB-26	0	2.71188e-05	0
k__Bacteria;p__Cyanobacteria;c__Nostocophycideae;o__Nostocales	0	2.49123e-05	0
k__Bacteria;p__Actinobacteria;c__MB-A2-108;o__0319-7L14	0	2.35803e-05	0
k__Bacteria;p__Proteobacteria;c__Gammaproteobacteria;o__34P16	0	2.23197e-05	0
k__Bacteria;p__Armatimonadetes;c__0319-6E2;o__	0	1.94981e-05	0
k__Bacteria;p__Gemmatimonadetes;c__Gemmatimonadetes;o__N1423WL	0	1.91266e-05	0
k__Bacteria;p__Proteobacteria;c__Gammaproteobacteria;o__Thiotrichales	0	1.91266e-05	0
k__Bacteria;p__Elusimicrobia;c__Elusimicrobia;o__IIb	0	1.7374e-05	0
k__Bacteria;p__Planctomycetes;c__C6;o__d113	0	1.71327e-05	0
k__Bacteria;p__Gemmatimonadetes;c__Gemm-3;o__	0	1.70353e-05	7.74341e-06
k__Bacteria;p__Planctomycetes;c__OM190;o__agg27	0	1.69553e-05	0
k__Bacteria;p__Chloroflexi;c__Chloroflexi;o__AKIW781	0	1.62018e-05	0
k__Bacteria;p__Acidobacteria;c__Acidobacteriia;o__Acidobacteriales	0	1.5066e-05	0
k__Bacteria;p__TM7;c__MJK10;o__	0	1.45331e-05	0
k__Bacteria;p__Proteobacteria;c__Gammaproteobacteria;o__Chromatiales	0	1.35015e-05	0
k__Bacteria;p__Proteobacteria;c__Gammaproteobacteria;o__Legionellales	0	1.3078e-05	7.74341e-06
k__Bacteria;p__Chloroflexi;c__Anaerolineae;o__GCA004	0	1.22376e-05	0
k__Bacteria;p__Fibrobacteres;c__Fibrobacteria;o__258ds10	0	1.21109e-05	0
k__Bacteria;p__TM7;c__SC3;o__	0	1.15827e-05	0
k__Bacteria;p__Acidobacteria;c__iii1-8;o__DS-18	0	1.15797e-05	0
k__Bacteria;p__Gemmatimonadetes;c__Gemmatimonadetes;o__	0	8.1009e-06	0
k__Bacteria;p__Chloroflexi;c__TK17;o__mle1-48	0	7.71979e-06	0
k__Bacteria;p__Acidobacteria;c__iii1-8;o__32-20	0	7.43989e-06	0
k__Bacteria;p__Cyanobacteria;c__Nostocophycideae;o__Stigonematales	0	3.3001e-06	0
k__Bacteria;p__Tenericutes;c__RF3;o__ML615J-28	0	2.55323e-06	8.64611e-05
k__Bacteria;p__TM6;c__SJA-4;o__	0	2.55323e-06	0
k__Bacteria;p__Tenericutes;c__Mollicutes;o__RsaHF231	0	0	5.49499e-05
k__Bacteria;p__Planctomycetes;c__vadinHA49;o__PeHg47	0	0	5.17478e-05
k__Bacteria;p__Fibrobacteres;c__Fibrobacteria;o__Fibrobacterales	0	0	4.03642e-05
k__Archaea;p__Euryarchaeota;c__Methanomicrobia;o__Methanosarcinales	0	0	3.92198e-05

## Sheet: Family level
	AjBiodôme	AjZoo	CpBiodôme
k__Bacteria;p__Actinobacteria;c__Actinobacteria;o__Actinomycetales;f__Micrococcaceae	0.242817	0.0803475	0.131477
k__Bacteria;p__Cyanobacteria;c__Chloroplast;o__Streptophyta;f__	0.122005	0.173187	0.0895274
k__Bacteria;p__Proteobacteria;c__Betaproteobacteria;o__Neisseriales;f__Neisseriaceae	0.0656176	0.072442	0.114409
k__Bacteria;p__Proteobacteria;c__Gammaproteobacteria;o__Enterobacteriales;f__Enterobacteriaceae	0.0572936	0.0196241	0.0700417
k__Bacteria;p__Firmicutes;c__Bacilli;o__Lactobacillales;f__Streptococcaceae	0.0545592	0.16294	0.0413213
k__Bacteria;p__Proteobacteria;c__Gammaproteobacteria;o__Pseudomonadales;f__Moraxellaceae	0.0424834	0.00777142	0.0291454
k__Bacteria;p__Firmicutes;c__Bacilli;o__Lactobacillales;f__Aerococcaceae	0.0368347	0.0057835	0.0112844
k__Bacteria;p__Actinobacteria;c__Actinobacteria;o__Actinomycetales;f__Corynebacteriaceae	0.0303176	0.0172249	0.0344274
k__Bacteria;p__Actinobacteria;c__Actinobacteria;o__Actinomycetales;f__Microbacteriaceae	0.0255101	0.0045769	0.00430299
k__Bacteria;p__Proteobacteria;c__Gammaproteobacteria;o__Pseudomonadales;f__Pseudomonadaceae	0.0244634	0.00250665	0.013537
k__Bacteria;p__Actinobacteria;c__Actinobacteria;o__Actinomycetales;f__Brevibacteriaceae	0.0240876	0.0007114	0.0281638
k__Bacteria;p__Actinobacteria;c__Actinobacteria;o__Actinomycetales;f__Bogoriellaceae	0.0236099	0.000378503	0.0130064
k__Bacteria;p__Proteobacteria;c__Betaproteobacteria;o__Burkholderiales;f__Burkholderiaceae	0.0234405	0.0472724	0.0474092
k__Bacteria;p__Firmicutes;c__Bacilli;o__Bacillales;f__Bacillaceae	0.0233728	0.00860785	0.0129843
k__Bacteria;p__Firmicutes;c__Bacilli;o__Bacillales;f__Staphylococcaceae	0.0207131	0.0203062	0.00763436
k__Bacteria;p__Actinobacteria;c__Actinobacteria;o__Actinomycetales;f__Dietziaceae	0.0184634	0.00171121	0.0299443
k__Bacteria;p__Proteobacteria;c__Gammaproteobacteria;o__Pasteurellales;f__Pasteurellaceae	0.0181841	0.0316485	0.0350226
k__Bacteria;p__Proteobacteria;c__Alphaproteobacteria;o__Rickettsiales;f__mitochondria	0.0177054	0.0138932	0.00835121
k__Bacteria;p__Actinobacteria;c__Actinobacteria;o__Actinomycetales;Other	0.0155435	0.00090367	0.00465449
k__Bacteria;p__Actinobacteria;c__Actinobacteria;o__Actinomycetales;f__Pseudonocardiaceae	0.0137544	0.00223582	0.0946741
k__Bacteria;p__Fusobacteria;c__Fusobacteriia;o__Fusobacteriales;f__Leptotrichiaceae	0.0102742	0.00791027	0.0114825
k__Bacteria;p__Proteobacteria;c__Gammaproteobacteria;o__Alteromonadales;f__Idiomarinaceae	0.00870062	0	0.00145183
k__Bacteria;p__Actinobacteria;c__Actinobacteria;o__Actinomycetales;f__Actinomycetaceae	0.00634451	0.0157742	0.00861811
k__Bacteria;p__Firmicutes;c__Clostridia;o__Clostridiales;f__Ruminococcaceae	0.00453197	0.00480013	0.0035875
k__Bacteria;p__Actinobacteria;c__Actinobacteria;o__Actinomycetales;f__Dermabacteraceae	0.0040712	0.00470639	0.00815811
k__Bacteria;p__Firmicutes;c__Clostridia;o__Clostridiales;f__[Tissierellaceae]	0.00378684	0.00199741	0.0026456
k__Bacteria;p__Firmicutes;c__Bacilli;o__Lactobacillales;f__Leuconostocaceae	0.00376508	0.00161738	0.0125426
k__Bacteria;p__Firmicutes;c__Clostridia;o__Clostridiales;f__Lachnospiraceae	0.00364348	0.00284653	0.00307149
k__Bacteria;p__Actinobacteria;c__Actinobacteria;o__Actinomycetales;f__Propionibacteriaceae	0.00337948	0.00618227	0.0144788
k__Bacteria;p__Firmicutes;c__Clostridia;o__Clostridiales;f__Veillonellaceae	0.0031772	0.00137848	0.00222089
k__Bacteria;p__Firmicutes;c__Clostridia;o__Clostridiales;f__Clostridiaceae	0.00314678	0.0107256	0.00146712
k__Bacteria;p__Actinobacteria;c__Actinobacteria;o__Actinomycetales;f__Yaniellaceae	0.00304656	0.000790399	0.00120935
k__Bacteria;p__Firmicutes;c__Clostridia;o__Clostridiales;f__	0.00300714	0.00203203	0.00301566
k__Bacteria;p__Bacteroidetes;c__Flavobacteriia;o__Flavobacteriales;f__Flavobacteriaceae	0.00284279	0.00292454	0.00403388
k__Bacteria;p__Bacteroidetes;c__Bacteroidia;o__Bacteroidales;f__Bacteroidaceae	0.00253729	0.0017717	0.00271453
k__Bacteria;p__Proteobacteria;c__Betaproteobacteria;o__Burkholderiales;f__Comamonadaceae	0.00219487	0.00930677	0.0082501
k__Bacteria;p__Firmicutes;c__Bacilli;o__Gemellales;f__Gemellaceae	0.00195463	0.00216385	0.000833426
k__Bacteria;p__Bacteroidetes;c__Flavobacteriia;o__Flavobacteriales;f__[Weeksellaceae]	0.00188635	0.00910846	0.00432765
k__Bacteria;p__Fusobacteria;c__Fusobacteriia;o__Fusobacteriales;f__Fusobacteriaceae	0.00175137	0.00104209	0.0015721
k__Bacteria;p__Proteobacteria;c__Gammaproteobacteria;o__Cardiobacteriales;f__Cardiobacteriaceae	0.00161894	0.00267455	0.00852391
k__Archaea;p__Euryarchaeota;c__Halobacteria;o__Halobacteriales;f__Halobacteriaceae	0.00146712	0	0.00256074
k__Bacteria;p__Actinobacteria;c__Actinobacteria;o__Actinomycetales;f__Gordoniaceae	0.00145578	0.00141451	0.00110436
k__Bacteria;p__Bacteroidetes;c__Bacteroidia;o__Bacteroidales;f__Prevotellaceae	0.00140438	0.00250047	0.00174371
k__Bacteria;p__Proteobacteria;c__Alphaproteobacteria;o__Sphingomonadales;f__Sphingomonadaceae	0.00137961	0.0154739	0.00814629
k__Bacteria;p__Bacteroidetes;c__Bacteroidia;o__Bacteroidales;f__Porphyromonadaceae	0.0012537	0.000911675	0.0024406
Unassigned;Other;Other;Other;Other	0.00102683	0.00633161	0.00169116
k__Bacteria;p__Firmicutes;c__Bacilli;o__Lactobacillales;Other	0.000924428	0.00491258	0.000702101
k__Bacteria;p__Actinobacteria;c__Actinobacteria;o__Bifidobacteriales;f__Bifidobacteriaceae	0.000812441	0.00173486	0.000674369
k__Bacteria;p__Actinobacteria;c__Actinobacteria;o__Actinomycetales;f__	0.000718771	0.00249639	0.000758461
k__Bacteria;p__Firmicutes;c__Bacilli;o__Bacillales;f__[Exiguobacteraceae]	0.000688522	9.51531e-05	0.000386478
k__Bacteria;p__TM7;c__TM7-3;o__;f__	0.000677544	0.00268129	0.00459636
k__Bacteria;p__Proteobacteria;c__Alphaproteobacteria;o__Rhodobacterales;f__Rhodobacteraceae	0.000620577	0.0164483	0.00236847
k__Bacteria;p__Actinobacteria;c__Nitriliruptoria;o__Nitriliruptorales;f__Nitriliruptoraceae	0.000614739	0	0.000497636
k__Bacteria;p__Bacteroidetes;c__Sphingobacteriia;o__Sphingobacteriales;f__Sphingobacteriaceae	0.00060291	0.00410564	0.000269581
k__Bacteria;p__TM7;c__TM7-3;o__CW040;f__	0.000586476	0	0.000644335
k__Bacteria;p__Firmicutes;c__Bacilli;o__Lactobacillales;f__Carnobacteriaceae	0.000565646	0.000385838	0.000299528
k__Bacteria;p__Actinobacteria;c__Rubrobacteria;o__Rubrobacterales;f__Rubrobacteraceae	0.000558403	4.24344e-05	0.00497662
k__Bacteria;p__Actinobacteria;c__Actinobacteria;o__Actinomycetales;f__Nocardioidaceae	0.00055653	0.0323862	0.00275347
k__Bacteria;p__Firmicutes;c__Bacilli;o__Bacillales;f__Alicyclobacillaceae	0.000502132	0.00582729	0.00500212
k__Bacteria;p__Actinobacteria;c__Actinobacteria;o__Actinomycetales;f__Intrasporangiaceae	0.000494107	0.00946851	0.00616157
k__Bacteria;p__Bacteroidetes;c__Bacteroidia;o__Bacteroidales;f__[Paraprevotellaceae]	0.000395845	0.000437594	0.000682191
k__Bacteria;p__Firmicutes;c__Erysipelotrichi;o__Erysipelotrichales;f__Erysipelotrichaceae	0.000326152	0.000668488	0.000465232
k__Bacteria;p__Firmicutes;c__Clostridia;o__Clostridiales;f__Christensenellaceae	0.000283098	0.000178154	0.000567209
k__Bacteria;p__Actinobacteria;c__Nitriliruptoria;o__Euzebyales;f__Euzebyaceae	0.00025998	0	0.000214576
k__Bacteria;p__Tenericutes;c__Mollicutes;o__RF39;f__	0.00025271	0.000101537	0.000251104
k__Bacteria;p__Proteobacteria;c__Gammaproteobacteria;o__Salinisphaerales;f__Salinisphaeraceae	0.000248524	0	0.000717295
k__Bacteria;p__Chloroflexi;c__Thermomicrobia;o__JG30-KF-CM45;f__	0.00022759	0.00117392	0.000579039
k__Bacteria;p__Proteobacteria;c__Betaproteobacteria;o__Burkholderiales;f__Oxalobacteraceae	0.000223435	0.00637207	0.00164038
k__Bacteria;p__Bacteroidetes;c__Bacteroidia;o__Bacteroidales;f__Rikenellaceae	0.000194859	6.55929e-05	0.000573578
k__Bacteria;p__Bacteroidetes;c__Cytophagia;o__Cytophagales;f__Cytophagaceae	0.000183016	0.00514057	0.00151892
k__Bacteria;p__Proteobacteria;c__Gammaproteobacteria;o__Oceanospirillales;f__Alcanivoracaceae	0.000182857	0	0
k__Bacteria;p__Actinobacteria;c__Actinobacteria;o__Actinomycetales;f__Dermatophilaceae	0.000171847	0.0126111	0.000266254
k__Bacteria;p__Verrucomicrobia;c__Verrucomicrobiae;o__Verrucomicrobiales;f__Verrucomicrobiaceae	0.000161104	0.000273634	0.000335892
k__Bacteria;p__Actinobacteria;c__Actinobacteria;o__Actinomycetales;f__Dermacoccaceae	0.000159391	0.000227617	0.000866728
k__Bacteria;p__Actinobacteria;c__Coriobacteriia;o__Coriobacteriales;f__Coriobacteriaceae	0.000154316	0.000249445	0.000106514
k__Bacteria;p__Proteobacteria;c__Epsilonproteobacteria;o__Campylobacterales;f__Campylobacteraceae	0.000149071	0.014775	0.000175333
k__Bacteria;p__Proteobacteria;c__Alphaproteobacteria;o__Rhodospirillales;f__Acetobacteraceae	0.000139791	0.00161826	0.00209303
k__Bacteria;p__Proteobacteria;c__Alphaproteobacteria;o__Rhizobiales;f__Aurantimonadaceae	0.00013761	6.57598e-05	5.08493e-05
k__Bacteria;p__Proteobacteria;c__Betaproteobacteria;o__Burkholderiales;f__Alcaligenaceae	0.000132724	0.000178804	3.70415e-05
k__Bacteria;p__Proteobacteria;c__Betaproteobacteria;o__Rhodocyclales;f__Rhodocyclaceae	0.000127548	0.000629878	1.88335e-05
k__Bacteria;p__Firmicutes;c__Bacilli;o__Lactobacillales;f__Enterococcaceae	0.000117687	0.000318418	0.00128619
k__Bacteria;p__Lentisphaerae;c__[Lentisphaeria];o__Victivallales;f__Victivallaceae	0.000112669	6.6872e-06	0.000142981
k__Bacteria;p__Bacteroidetes;c__Flavobacteriia;o__Flavobacteriales;f__Blattabacteriaceae	0.000111732	0	0.000979894
k__Bacteria;p__Proteobacteria;c__Gammaproteobacteria;o__Xanthomonadales;f__Xanthomonadaceae	0.000101928	0.00776812	0.00107295
k__Bacteria;p__Bacteroidetes;c__Sphingobacteriia;o__Sphingobacteriales;f__	9.99778e-05	0.000210573	0.000271758
k__Bacteria;p__Actinobacteria;c__Actinobacteria;o__Actinomycetales;f__ACK-M1	9.69326e-05	3.94918e-05	0.000196683
k__Bacteria;p__Planctomycetes;c__Phycisphaerae;o__Phycisphaerales;f__	9.13659e-05	1.48504e-05	0
k__Bacteria;p__Firmicutes;c__Clostridia;o__Clostridiales;Other	8.62475e-05	0.000277665	8.15615e-05
k__Bacteria;p__Proteobacteria;c__Alphaproteobacteria;o__Rhizobiales;f__	8.61625e-05	0.00166384	0.000106444
k__Bacteria;p__Bacteroidetes;c__Bacteroidia;o__Bacteroidales;f__[Barnesiellaceae]	8.61335e-05	0.000256733	2.22731e-05
k__Bacteria;p__Firmicutes;c__Clostridia;o__Clostridiales;f__Peptostreptococcaceae	8.26714e-05	0.00297769	0.000207759
k__Bacteria;p__Proteobacteria;c__Alphaproteobacteria;o__Sphingomonadales;f__Erythrobacteraceae	7.69953e-05	0.00113293	0.000250538
k__Bacteria;p__Firmicutes;c__Clostridia;o__Clostridiales;f__[Mogibacteriaceae]	7.65852e-05	0.000920949	9.06314e-05
k__Bacteria;p__Proteobacteria;c__Alphaproteobacteria;o__Rhizobiales;f__Rhizobiaceae	7.6486e-05	0.00297093	0
k__Bacteria;p__Proteobacteria;c__Alphaproteobacteria;o__Rhizobiales;f__Bradyrhizobiaceae	7.04226e-05	0.00096753	0.000384385
k__Bacteria;p__Tenericutes;c__Mollicutes;o__Mycoplasmatales;f__Mycoplasmataceae	6.44093e-05	0.000850203	1.67774e-05
k__Bacteria;p__Proteobacteria;c__Gammaproteobacteria;o__Alteromonadales;f__[Chromatiaceae]	6.36983e-05	4.78867e-05	9.67329e-05
k__Bacteria;p__Proteobacteria;c__Alphaproteobacteria;o__Caulobacterales;f__Caulobacteraceae	6.18007e-05	0.00150549	0.00057982
k__Bacteria;p__Firmicutes;c__Bacilli;o__Lactobacillales;f__	5.95223e-05	7.26654e-06	0.000697949
k__Bacteria;p__Chloroflexi;c__Thermomicrobia;o__;f__	5.71256e-05	0	1.01305e-05
k__Bacteria;p__GN02;c__BD1-5;o__;f__	5.18657e-05	3.34715e-05	0.000725985
k__Bacteria;p__Verrucomicrobia;c__Verruco-5;o__WCHB1-41;f__RFP12	5.15278e-05	0.000198578	0.000140576
k__Bacteria;p__Firmicutes;c__Clostridia;o__Clostridiales;f__Peptococcaceae	5.02176e-05	3.84123e-05	7.38941e-05
k__Bacteria;p__Proteobacteria;c__Deltaproteobacteria;o__FAC87;f__	4.94167e-05	0	0.000300616
k__Bacteria;p__Proteobacteria;c__Alphaproteobacteria;o__Rhizobiales;f__Phyllobacteriaceae	4.28719e-05	0.000897433	4.53916e-05
k__Bacteria;p__Proteobacteria;c__Alphaproteobacteria;o__Rhizobiales;f__Methylobacteriaceae	4.15009e-05	0.00147616	0.000550865
k__Bacteria;p__Actinobacteria;c__Actinobacteria;o__Actinomycetales;f__Mycobacteriaceae	3.62245e-05	0.00282406	0.000430584
k__Bacteria;p__Chloroflexi;c__Anaerolineae;o__SBR1031;f__A4b	3.34784e-05	4.67599e-05	0
k__Bacteria;p__Actinobacteria;c__Actinobacteria;o__Actinomycetales;f__Nocardiaceae	3.21121e-05	0.00239034	8.26582e-05
k__Bacteria;p__Proteobacteria;c__Deltaproteobacteria;o__Desulfovibrionales;f__Desulfovibrionaceae	3.07057e-05	0.000413903	0.000247205
k__Bacteria;p__Firmicutes;c__Bacilli;o__Bacillales;f__Listeriaceae	3.04172e-05	1.92995e-06	0
k__Bacteria;p__Cyanobacteria;c__4C0d-2;o__MLE1-12;f__	2.79304e-05	0.000184687	2.0261e-05
k__Bacteria;p__Tenericutes;c__Mollicutes;o__Anaeroplasmatales;f__Anaeroplasmataceae	2.62521e-05	0	0.000322864
k__Bacteria;p__Proteobacteria;c__Gammaproteobacteria;o__Alteromonadales;f__Alteromonadaceae	2.5339e-05	0.000223726	8.28721e-05
k__Bacteria;p__Firmicutes;c__Bacilli;o__Bacillales;f__Paenibacillaceae	2.48062e-05	0.000418443	5.08639e-05
k__Bacteria;p__Cyanobacteria;c__Chloroplast;o__Stramenopiles;f__	2.45806e-05	0.000179728	0.000195442
k__Bacteria;p__Planctomycetes;c__Planctomycetia;o__Gemmatales;f__Gemmataceae	2.31106e-05	0.000344814	2.58292e-05
k__Archaea;p__Euryarchaeota;c__Methanobacteria;o__Methanobacteriales;f__Methanobacteriaceae	2.04022e-05	0.00010276	1.85074e-05
k__Bacteria;p__Acidobacteria;c__[Chloracidobacteria];o__RB41;f__Ellin6075	1.92567e-05	0.00407351	0.000184856
k__Bacteria;p__Actinobacteria;c__Actinobacteria;o__Actinomycetales;f__Beutenbergiaceae	1.85307e-05	0.000501217	8.37689e-06
k__Bacteria;p__Armatimonadetes;c__Armatimonadia;o__Armatimonadales;f__Armatimonadaceae	1.67392e-05	0.000385847	8.8219e-05
k__Bacteria;p__Synergistetes;c__Synergistia;o__Synergistales;f__Dethiosulfovibrionaceae	1.67392e-05	9.92914e-05	0
k__Bacteria;p__Proteobacteria;c__Alphaproteobacteria;o__Sphingomonadales;f__	1.56752e-05	0.000554021	0
k__Bacteria;p__Spirochaetes;c__Spirochaetes;o__Spirochaetales;f__Spirochaetaceae	1.12892e-05	0.000255549	0
k__Bacteria;p__Actinobacteria;c__Thermoleophilia;o__Solirubrobacterales;f__Solirubrobacteraceae	1.0989e-05	0.000320909	2.51307e-05
k__Bacteria;p__Proteobacteria;c__Gammaproteobacteria;o__Xanthomonadales;f__Sinobacteraceae	1.04501e-05	0.000821551	6.70151e-05
k__Bacteria;p__Actinobacteria;c__Actinobacteria;o__Actinomycetales;f__Kineosporiaceae	9.62835e-06	0.000875802	0.000117767
k__Bacteria;p__Bacteroidetes;c__Flavobacteriia;o__Flavobacteriales;f__Cryomorphaceae	9.62835e-06	0.000189309	3.6982e-05
k__Bacteria;p__Proteobacteria;c__Alphaproteobacteria;o__RF32;f__	9.62835e-06	0	1.02363e-05
k__Bacteria;p__Proteobacteria;c__Alphaproteobacteria;o__Rickettsiales;f__	9.62835e-06	0	0
k__Bacteria;p__Proteobacteria;c__Betaproteobacteria;o__;f__	7.8376e-06	0.000189079	6.56837e-05
k__Bacteria;p__Proteobacteria;c__Alphaproteobacteria;o__Rhizobiales;f__Hyphomicrobiaceae	7.32601e-06	0.00164536	6.28444e-05
k__Bacteria;p__Bacteroidetes;c__[Saprospirae];o__[Saprospirales];f__Chitinophagaceae	6.27554e-06	0.00407423	0.00024993
k__Bacteria;p__Actinobacteria;c__Actinobacteria;o__Actinomycetales;f__Nocardiopsaceae	5.64462e-06	5.55924e-05	0.000414443
k__Bacteria;p__Firmicutes;c__Bacilli;o__Bacillales;f__	5.64462e-06	0.000280525	1.48127e-05
k__Bacteria;p__Proteobacteria;c__Alphaproteobacteria;o__Rhizobiales;f__Methylocystaceae	5.64462e-06	0.000245672	0.000376255
k__Bacteria;p__Proteobacteria;c__Deltaproteobacteria;o__Bdellovibrionales;f__Bacteriovoracaceae	5.64462e-06	0.000182282	0.000114233
k__Bacteria;p__Actinobacteria;c__Actinobacteria;o__Actinomycetales;f__Williamsiaceae	5.22507e-06	0.000118598	0
k__Bacteria;p__Planctomycetes;c__Phycisphaerae;o__WD2101;f__	5.22507e-06	2.43027e-05	0
k__Bacteria;p__Proteobacteria;c__Alphaproteobacteria;o__;f__	5.22507e-06	0.000210236	0
k__Bacteria;p__Firmicutes;c__Bacilli;o__Bacillales;f__Planococcaceae	3.663e-06	0.000145392	0.00025587
k__Bacteria;p__Firmicutes;c__Bacilli;o__Lactobacillales;f__Lactobacillaceae	3.663e-06	0	4.98951e-05
k__Bacteria;p__Verrucomicrobia;c__[Spartobacteria];o__[Chthoniobacterales];f__[Chthoniobacteraceae]	3.663e-06	0.000123379	0.000149878
k__Bacteria;p__Actinobacteria;c__Thermoleophilia;o__Gaiellales;f__Gaiellaceae	2.61253e-06	0.000644942	0
k__Bacteria;p__Proteobacteria;c__Alphaproteobacteria;o__Rhodospirillales;f__Rhodospirillaceae	2.61253e-06	0.000625471	0
k__Bacteria;p__Proteobacteria;c__Gammaproteobacteria;o__Aeromonadales;f__Aeromonadaceae	2.61253e-06	0.000851766	0.000235266
k__Archaea;p__Crenarchaeota;c__Thaumarchaeota;o__Nitrososphaerales;f__Nitrososphaeraceae	0	3.12108e-05	2.04725e-05
k__Archaea;p__Euryarchaeota;c__Methanomicrobia;o__Methanosarcinales;f__Methanosarcinaceae	0	0	4.24881e-05
k__Bacteria;p__Acidobacteria;c__Acidobacteria-5;o__;f__	0	7.1408e-05	0
k__Bacteria;p__Acidobacteria;c__Acidobacteria-6;o__iii1-15;f__	0	0.000458959	0
k__Bacteria;p__Acidobacteria;c__Acidobacteria-6;o__iii1-15;f__RB40	0	5.40063e-05	0
k__Bacteria;p__Acidobacteria;c__Acidobacteria-6;o__iii1-15;f__mb2424	0	0.00010373	0
k__Bacteria;p__Acidobacteria;c__Acidobacteriia;o__Acidobacteriales;f__Acidobacteriaceae	0	1.5066e-05	0
k__Bacteria;p__Acidobacteria;c__Solibacteres;o__Solibacterales;f__	0	4.45513e-05	0
k__Bacteria;p__Acidobacteria;c__Sva0725;o__Sva0725;f__	0	4.47537e-05	0
k__Bacteria;p__Acidobacteria;c__[Chloracidobacteria];o__DS-100;f__	0	4.52564e-05	0
k__Bacteria;p__Acidobacteria;c__iii1-8;o__32-20;f__	0	7.43989e-06	0
k__Bacteria;p__Acidobacteria;c__iii1-8;o__DS-18;f__	0	1.15797e-05	0
k__Bacteria;p__Actinobacteria;c__Acidimicrobiia;o__Acidimicrobiales;Other	0	1.15797e-05	0
k__Bacteria;p__Actinobacteria;c__Acidimicrobiia;o__Acidimicrobiales;f__	0	0.000870958	0.00017135
k__Bacteria;p__Actinobacteria;c__Acidimicrobiia;o__Acidimicrobiales;f__C111	0	0.000385516	0
k__Bacteria;p__Actinobacteria;c__Acidimicrobiia;o__Acidimicrobiales;f__EB1017	0	5.94028e-05	9.15298e-06
k__Bacteria;p__Actinobacteria;c__Acidimicrobiia;o__Acidimicrobiales;f__Iamiaceae	0	0.000284825	0
k__Bacteria;p__Actinobacteria;c__Acidimicrobiia;o__Acidimicrobiales;f__Microthrixaceae	0	2.33799e-05	0
k__Bacteria;p__Actinobacteria;c__Actinobacteria;o__Actinomycetales;f__Actinopolysporaceae	0	0	0.000138729
k__Bacteria;p__Actinobacteria;c__Actinobacteria;o__Actinomycetales;f__Actinosynnemataceae	0	2.58997e-05	0.000145907
k__Bacteria;p__Actinobacteria;c__Actinobacteria;o__Actinomycetales;f__Cellulomonadaceae	0	0.000439718	3.53392e-06
k__Bacteria;p__Actinobacteria;c__Actinobacteria;o__Actinomycetales;f__Frankiaceae	0	4.21848e-05	1.67538e-05
k__Bacteria;p__Actinobacteria;c__Actinobacteria;o__Actinomycetales;f__Geodermatophilaceae	0	0.000263476	0.000603057
k__Bacteria;p__Actinobacteria;c__Actinobacteria;o__Actinomycetales;f__Micromonosporaceae	0	0.000301633	0
k__Bacteria;p__Actinobacteria;c__Actinobacteria;o__Actinomycetales;f__Nakamurellaceae	0	0.00086966	0
k__Bacteria;p__Actinobacteria;c__Actinobacteria;o__Actinomycetales;f__Sporichthyaceae	0	7.75972e-05	0
k__Bacteria;p__Actinobacteria;c__Actinobacteria;o__Actinomycetales;f__Streptomycetaceae	0	3.41792e-05	8.10438e-05
k__Bacteria;p__Actinobacteria;c__Actinobacteria;o__Actinomycetales;f__Thermomonosporaceae	0	2.06696e-05	0
k__Bacteria;p__Actinobacteria;c__MB-A2-108;o__0319-7L14;f__	0	2.35803e-05	0
k__Bacteria;p__Actinobacteria;c__Thermoleophilia;o__Gaiellales;f__	0	0.000200905	0
k__Bacteria;p__Actinobacteria;c__Thermoleophilia;o__Solirubrobacterales;f__	0	0.000668096	0.000194367
k__Bacteria;p__Actinobacteria;c__Thermoleophilia;o__Solirubrobacterales;f__Conexibacteraceae	0	0.000105044	0
k__Bacteria;p__Actinobacteria;c__Thermoleophilia;o__Solirubrobacterales;f__Patulibacteraceae	0	9.68471e-05	0
k__Bacteria;p__Armatimonadetes;c__0319-6E2;o__;f__	0	1.94981e-05	0
k__Bacteria;p__Armatimonadetes;c__Armatimonadia;o__FW68;f__	0	0.000151354	0
k__Bacteria;p__Armatimonadetes;c__SJA-176;o__RB046;f__	0	0	0
k__Bacteria;p__Armatimonadetes;c__[Fimbriimonadia];o__[Fimbriimonadales];f__[Fimbriimonadaceae]	0	0.000289545	0
k__Bacteria;p__BRC1;c__PRR-11;o__;f__	0	0.000232422	0
k__Bacteria;p__Bacteroidetes;c__Bacteroidia;o__Bacteroidales;f__	0	0.0006539	7.74383e-05
k__Bacteria;p__Bacteroidetes;c__Bacteroidia;o__Bacteroidales;f__GZKB119	0	0	1.71945e-05
k__Bacteria;p__Bacteroidetes;c__Bacteroidia;o__Bacteroidales;f__RF16	0	0.000375014	0
k__Bacteria;p__Bacteroidetes;c__Bacteroidia;o__Bacteroidales;f__S24-7	0	0.000200863	0
k__Bacteria;p__Bacteroidetes;c__Bacteroidia;o__Bacteroidales;f__[Odoribacteraceae]	0	2.86899e-05	0.000214327
k__Bacteria;p__Bacteroidetes;c__Cytophagia;o__Cytophagales;f__	0	5.73798e-05	0
k__Bacteria;p__Bacteroidetes;c__VC2_1_Bac22;o__;f__	0	3.31452e-05	0
k__Bacteria;p__Bacteroidetes;c__[Rhodothermi];o__[Rhodothermales];f__Rhodothermaceae	0	0.000127747	0
k__Bacteria;p__Bacteroidetes;c__[Saprospirae];o__[Saprospirales];f__Saprospiraceae	0	0.000131615	0
k__Bacteria;p__Chlamydiae;c__Chlamydiia;o__Chlamydiales;f__Parachlamydiaceae	0	6.82645e-05	0
k__Bacteria;p__Chlamydiae;c__Chlamydiia;o__Chlamydiales;f__Rhabdochlamydiaceae	0	0.00015898	0
k__Bacteria;p__Chlorobi;c__OPB56;o__;f__	0	0.000132187	0
k__Bacteria;p__Chloroflexi;c__Anaerolineae;o__Anaerolineales;f__Anaerolinaceae	0	2.90662e-05	0
k__Bacteria;p__Chloroflexi;c__Anaerolineae;o__Ardenscatenales;f__Ardenscatenaceae	0	6.30198e-05	0
k__Bacteria;p__Chloroflexi;c__Anaerolineae;o__CFB-26;f__	0	2.71188e-05	0
k__Bacteria;p__Chloroflexi;c__Anaerolineae;o__GCA004;f__	0	1.22376e-05	0
k__Bacteria;p__Chloroflexi;c__Anaerolineae;o__H39;f__	0	3.6669e-05	0.000100683
k__Bacteria;p__Chloroflexi;c__Anaerolineae;o__SBR1031;f__SHA-31	0	2.20277e-05	0
k__Bacteria;p__Chloroflexi;c__Anaerolineae;o__SBR1031;f__SJA-101	0	4.89505e-06	0
k__Bacteria;p__Chloroflexi;c__Anaerolineae;o__SBR1031;f__oc28	0	4.49517e-05	0
k__Bacteria;p__Chloroflexi;c__Anaerolineae;o__envOPS12;f__	0	0	0
k__Bacteria;p__Chloroflexi;c__C0119;o__;f__	0	9.94948e-05	0
k__Bacteria;p__Chloroflexi;c__Chloroflexi;o__AKIW781;f__	0	1.62018e-05	0
k__Bacteria;p__Chloroflexi;c__Chloroflexi;o__Chloroflexales;f__FFCH7168	0	8.98258e-05	0
k__Bacteria;p__Chloroflexi;c__Chloroflexi;o__Chloroflexales;f__Oscillochloridaceae	0	2.27823e-05	0
k__Bacteria;p__Chloroflexi;c__Chloroflexi;o__Herpetosiphonales;f__	0	6.80163e-05	0
k__Bacteria;p__Chloroflexi;c__Chloroflexi;o__[Roseiflexales];f__	0	2.86899e-05	0
k__Bacteria;p__Chloroflexi;c__Chloroflexi;o__[Roseiflexales];f__[Kouleothrixaceae]	0	4.55645e-05	0
k__Bacteria;p__Chloroflexi;c__Ellin6529;o__;f__	0	9.48226e-05	0
k__Bacteria;p__Chloroflexi;c__Gitt-GS-136;o__;f__	0	5.1439e-05	0
k__Bacteria;p__Chloroflexi;c__TK17;o__mle1-48;f__	0	7.71979e-06	0
k__Bacteria;p__Cyanobacteria;c__4C0d-2;o__YS2;f__	0	6.41531e-05	0
k__Bacteria;p__Cyanobacteria;c__Chloroplast;o__;f__	0	0.000120194	0
k__Bacteria;p__Cyanobacteria;c__Chloroplast;o__Chlorophyta;f__	0	0.000276627	0
k__Bacteria;p__Cyanobacteria;c__Chloroplast;o__Chlorophyta;f__Chlamydomonadaceae	0	3.3001e-06	0
k__Bacteria;p__Cyanobacteria;c__Chloroplast;o__Chlorophyta;f__Trebouxiophyceae	0	2.4586e-05	0
k__Bacteria;p__Cyanobacteria;c__ML635J-21;o__;f__	0	0.000204707	0
k__Bacteria;p__Cyanobacteria;c__Nostocophycideae;o__Nostocales;f__Nostocaceae	0	2.49123e-05	0
k__Bacteria;p__Cyanobacteria;c__Nostocophycideae;o__Stigonematales;f__Rivulariaceae	0	3.3001e-06	0
k__Bacteria;p__Cyanobacteria;c__Oscillatoriophycideae;o__Chroococcales;f__Gomphosphaeriaceae	0	0	0
k__Bacteria;p__Cyanobacteria;c__Oscillatoriophycideae;o__Oscillatoriales;f__Phormidiaceae	0	0.000111047	0
k__Bacteria;p__Cyanobacteria;c__Synechococcophycideae;o__Pseudanabaenales;f__Pseudanabaenaceae	0	5.43611e-05	0
k__Bacteria;p__Elusimicrobia;c__Elusimicrobia;o__Elusimicrobiales;f__Elusimicrobiaceae	0	7.52678e-05	0
k__Bacteria;p__Elusimicrobia;c__Elusimicrobia;o__IIb;f__	0	1.7374e-05	0
k__Bacteria;p__FBP;c__;o__;f__	0	0.000716817	0.000128249
k__Bacteria;p__Fibrobacteres;c__Fibrobacteria;o__258ds10;f__	0	1.21109e-05	0
k__Bacteria;p__Fibrobacteres;c__Fibrobacteria;o__Fibrobacterales;f__Fibrobacteraceae	0	0	4.37279e-05
k__Bacteria;p__Firmicutes;c__Bacilli;o__Bacillales;Other	0	0	0
k__Bacteria;p__Firmicutes;c__Bacilli;o__Bacillales;f__Thermoactinomycetaceae	0	3.91716e-05	0
k__Bacteria;p__Firmicutes;c__Bacilli;o__Bacillales;f__[Thermicanaceae]	0	0	1.67538e-05
k__Bacteria;p__Firmicutes;c__Bacilli;o__Turicibacterales;f__Turicibacteraceae	0	4.12309e-05	0
k__Bacteria;p__Firmicutes;c__Clostridia;o__Clostridiales;f__Caldicoprobacteraceae	0	0	9.23963e-05
k__Bacteria;p__Firmicutes;c__Clostridia;o__Clostridiales;f__Dehalobacteriaceae	0	3.0132e-05	0
k__Bacteria;p__Firmicutes;c__Clostridia;o__Clostridiales;f__EtOH8	0	1.87397e-05	0
k__Bacteria;p__Firmicutes;c__Clostridia;o__Clostridiales;f__Gracilibacteraceae	0	3.00395e-05	0
k__Bacteria;p__Firmicutes;c__Clostridia;o__Clostridiales;f__Symbiobacteriaceae	0	3.34715e-05	0
k__Bacteria;p__Firmicutes;c__Clostridia;o__Clostridiales;f__[Acidaminobacteraceae]	0	4.89505e-06	0
k__Bacteria;p__Fusobacteria;c__Fusobacteriia;o__Fusobacteriales;f__	0	1.002e-05	0
k__Bacteria;p__Gemmatimonadetes;c__Gemm-1;o__;f__	0	0.000157642	0
k__Bacteria;p__Gemmatimonadetes;c__Gemm-3;o__;f__	0	1.70353e-05	8.3887e-06
k__Bacteria;p__Gemmatimonadetes;c__Gemm-5;o__;f__	0	5.27991e-05	0
k__Bacteria;p__Gemmatimonadetes;c__Gemmatimonadetes;o__;f__	0	8.1009e-06	0
k__Bacteria;p__Gemmatimonadetes;c__Gemmatimonadetes;o__Ellin5290;f__	0	4.47182e-05	0
k__Bacteria;p__Gemmatimonadetes;c__Gemmatimonadetes;o__Gemmatimonadales;f__	0	3.42654e-05	0
k__Bacteria;p__Gemmatimonadetes;c__Gemmatimonadetes;o__Gemmatimonadales;f__Gemmatimonadaceae	0	0.000163714	0
k__Bacteria;p__Gemmatimonadetes;c__Gemmatimonadetes;o__N1423WL;f__	0	1.91266e-05	0
k__Bacteria;p__Planctomycetes;c__C6;o__d113;f__	0	1.71327e-05	0
k__Bacteria;p__Planctomycetes;c__OM190;o__agg27;f__	0	1.69553e-05	0
k__Bacteria;p__Planctomycetes;c__Planctomycetia;o__Gemmatales;f__Isosphaeraceae	0	0.000264635	0
k__Bacteria;p__Planctomycetes;c__Planctomycetia;o__Pirellulales;f__Pirellulaceae	0	0.000336406	4.18845e-05
k__Bacteria;p__Planctomycetes;c__Planctomycetia;o__Planctomycetales;f__Planctomycetaceae	0	0.00014742	0
k__Bacteria;p__Planctomycetes;c__vadinHA49;o__PeHg47;f__	0	0	5.60601e-05
k__Bacteria;p__Proteobacteria;c__Alphaproteobacteria;o__BD7-3;f__	0	0.000427998	0
k__Bacteria;p__Proteobacteria;c__Alphaproteobacteria;o__Ellin329;f__	0	4.30348e-05	0
k__Bacteria;p__Proteobacteria;c__Alphaproteobacteria;o__Rhizobiales;Other	0	0.00062833	2.46669e-05
k__Bacteria;p__Proteobacteria;c__Alphaproteobacteria;o__Rhizobiales;f__Beijerinckiaceae	0	0.000736495	6.36459e-05
k__Bacteria;p__Proteobacteria;c__Alphaproteobacteria;o__Rhizobiales;f__Xanthobacteraceae	0	0.000385466	0
k__Bacteria;p__Proteobacteria;c__Alphaproteobacteria;o__Rhodobacterales;f__Hyphomonadaceae	0	7.4713e-05	0
k__Bacteria;p__Proteobacteria;c__Alphaproteobacteria;o__Rhodospirillales;f__	0	0.000250869	0
k__Bacteria;p__Proteobacteria;c__Alphaproteobacteria;o__Rickettsiales;f__Pelagibacteraceae	0	0	5.66508e-05
k__Bacteria;p__Proteobacteria;c__Alphaproteobacteria;o__Rickettsiales;f__Rickettsiaceae	0	0	0
k__Bacteria;p__Proteobacteria;c__Betaproteobacteria;Other;Other	0	0.00388317	3.63858e-05
k__Bacteria;p__Proteobacteria;c__Betaproteobacteria;o__ASSO-13;f__	0	0.000110258	0
k__Bacteria;p__Proteobacteria;c__Betaproteobacteria;o__Burkholderiales;f__	0	8.88122e-05	0
k__Bacteria;p__Proteobacteria;c__Betaproteobacteria;o__Ellin6067;f__	0	0.000165791	0
k__Bacteria;p__Proteobacteria;c__Betaproteobacteria;o__Gallionellales;f__Gallionellaceae	0	0	0
k__Bacteria;p__Proteobacteria;c__Betaproteobacteria;o__Hydrogenophilales;f__Hydrogenophilaceae	0	0.000100146	0
k__Bacteria;p__Proteobacteria;c__Betaproteobacteria;o__Methylophilales;f__Methylophilaceae	0	0.000172148	0
k__Bacteria;p__Proteobacteria;c__Betaproteobacteria;o__Nitrosomonadales;f__Nitrosomonadaceae	0	0	0
k__Bacteria;p__Proteobacteria;c__Betaproteobacteria;o__Procabacteriales;f__Procabacteriaceae	0	0.00010087	0
k__Bacteria;p__Proteobacteria;c__Betaproteobacteria;o__SC-I-84;f__	0	0.000245583	9.15298e-06
k__Bacteria;p__Proteobacteria;c__Deltaproteobacteria;o__Bdellovibrionales;f__Bdellovibrionaceae	0	0.000123813	0
k__Bacteria;p__Proteobacteria;c__Deltaproteobacteria;o__Desulfuromonadales;f__Geobacteraceae	0	0.000143692	0
k__Bacteria;p__Proteobacteria;c__Deltaproteobacteria;o__GMD14H09;f__	0	3.32836e-05	0
k__Bacteria;p__Proteobacteria;c__Deltaproteobacteria;o__MIZ46;f__	0	0.00014179	0
k__Bacteria;p__Proteobacteria;c__Deltaproteobacteria;o__Myxococcales;f__	0	0.0013371	8.3887e-06
k__Bacteria;p__Proteobacteria;c__Deltaproteobacteria;o__Myxococcales;f__0319-6G20	0	0	0
k__Bacteria;p__Proteobacteria;c__Deltaproteobacteria;o__Myxococcales;f__Cystobacterineae	0	0.000135376	0
k__Bacteria;p__Proteobacteria;c__Deltaproteobacteria;o__Myxococcales;f__Haliangiaceae	0	0.000662789	0
k__Bacteria;p__Proteobacteria;c__Deltaproteobacteria;o__Myxococcales;f__Myxococcaceae	0	1.21109e-05	0
k__Bacteria;p__Proteobacteria;c__Deltaproteobacteria;o__Myxococcales;f__Nannocystaceae	0	7.14712e-05	0
k__Bacteria;p__Proteobacteria;c__Deltaproteobacteria;o__Myxococcales;f__Polyangiaceae	0	0.000153759	0
k__Bacteria;p__Proteobacteria;c__Deltaproteobacteria;o__Spirobacillales;f__	0	0.00014898	0
k__Bacteria;p__Proteobacteria;c__Deltaproteobacteria;o__Syntrophobacterales;f__Syntrophobacteraceae	0	6.59525e-05	0
k__Bacteria;p__Proteobacteria;c__Epsilonproteobacteria;o__Campylobacterales;f__Helicobacteraceae	0	0.00529141	0.00011212
k__Bacteria;p__Proteobacteria;c__Gammaproteobacteria;o__34P16;f__	0	2.23197e-05	0
k__Bacteria;p__Proteobacteria;c__Gammaproteobacteria;o__Alteromonadales;f__OM60	0	2.6644e-05	0
k__Bacteria;p__Proteobacteria;c__Gammaproteobacteria;o__Chromatiales;f__	0	1.35015e-05	0
k__Bacteria;p__Proteobacteria;c__Gammaproteobacteria;o__Legionellales;f__Coxiellaceae	0	0	0
k__Bacteria;p__Proteobacteria;c__Gammaproteobacteria;o__Legionellales;f__Legionellaceae	0	1.3078e-05	8.3887e-06
k__Bacteria;p__Proteobacteria;c__Gammaproteobacteria;o__Methylococcales;f__Crenotrichaceae	0	0	0
k__Bacteria;p__Proteobacteria;c__Gammaproteobacteria;o__Oceanospirillales;f__Halomonadaceae	0	0	0
k__Bacteria;p__Proteobacteria;c__Gammaproteobacteria;o__Thiotrichales;f__Piscirickettsiaceae	0	1.91266e-05	0
k__Bacteria;p__Proteobacteria;c__Gammaproteobacteria;o__Vibrionales;f__Pseudoalteromonadaceae	0	0.000108384	0
k__Bacteria;p__Proteobacteria;c__TA18;o__PHOS-HD29;f__	0	0	0
k__Bacteria;p__Spirochaetes;c__Spirochaetes;o__Sphaerochaetales;f__Sphaerochaetaceae	0	5.01786e-05	0
k__Bacteria;p__TM6;c__SJA-4;o__;f__	0	2.55323e-06	0
k__Bacteria;p__TM7;c__MJK10;o__;f__	0	1.45331e-05	0
k__Bacteria;p__TM7;c__SC3;o__;f__	0	1.15827e-05	0
k__Bacteria;p__TM7;c__TM7-1;o__;f__	0	0.000238124	3.35076e-05
k__Bacteria;p__TM7;c__TM7-3;o__CW040;f__F16	0	0.000103869	0
k__Bacteria;p__TM7;c__TM7-3;o__EW055;f__	0	0.000319589	0
k__Bacteria;p__TM7;c__TM7-3;o__I025;f__	0	0.000120902	0
k__Bacteria;p__TM7;c__TM7-3;o__I025;f__Rs-045	0	0.000594543	0
k__Bacteria;p__Tenericutes;c__Mollicutes;o__RsaHF231;f__	0	0	5.9529e-05
k__Bacteria;p__Tenericutes;c__RF3;o__ML615J-28;f__	0	2.55323e-06	9.36662e-05
k__Bacteria;p__Verrucomicrobia;c__Opitutae;o__Opitutales;f__Opitutaceae	0	3.79532e-05	1.41357e-05
k__Bacteria;p__Verrucomicrobia;c__Opitutae;o__[Cerasicoccales];f__[Cerasicoccaceae]	0	0	0
k__Bacteria;p__Verrucomicrobia;c__Verruco-5;o__WCHB1-41;f__WCHB1-25	0	4.89505e-06	4.11884e-05
k__Bacteria;p__Verrucomicrobia;c__[Pedosphaerae];o__[Pedosphaerales];f__auto67_4W	0	3.0132e-05	0
k__Bacteria;p__Verrucomicrobia;c__[Spartobacteria];o__[Chthoniobacterales];f__01D2Z36	0	8.34998e-06	0
k__Bacteria;p__[Thermi];c__Deinococci;o__Deinococcales;f__Deinococcaceae	0	0.00472344	9.3639e-05
k__Bacteria;p__[Thermi];c__Deinococci;o__Deinococcales;f__Trueperaceae	0	0.000420452	0.000284164
k__Bacteria;p__[Thermi];c__Deinococci;o__Thermales;f__Thermaceae	0	4.75909e-05	3.74693e-05

## Sheet: Genus level
	AjBiodôme	AjZoo	CpBiodôme
k__Bacteria;p__Actinobacteria;c__Actinobacteria;o__Actinomycetales;f__Micrococcaceae;g__Nesterenkonia	0.191107	0.00172426	0.0994425
k__Bacteria;p__Cyanobacteria;c__Chloroplast;o__Streptophyta;f__;g__	0.122005	0.173187	0.0895274
k__Bacteria;p__Firmicutes;c__Bacilli;o__Lactobacillales;f__Streptococcaceae;g__Streptococcus	0.0536687	0.160177	0.0375408
k__Bacteria;p__Proteobacteria;c__Betaproteobacteria;o__Neisseriales;f__Neisseriaceae;g__	0.044743	0.05751	0.0676569
k__Bacteria;p__Proteobacteria;c__Gammaproteobacteria;o__Pseudomonadales;f__Moraxellaceae;g__Acinetobacter	0.0394823	0.00533772	0.0280268
k__Bacteria;p__Actinobacteria;c__Actinobacteria;o__Actinomycetales;f__Micrococcaceae;Other	0.0384387	0.00086572	0.00887795
k__Bacteria;p__Proteobacteria;c__Gammaproteobacteria;o__Enterobacteriales;f__Enterobacteriaceae;g__	0.0335276	0.0175302	0.058023
k__Bacteria;p__Actinobacteria;c__Actinobacteria;o__Actinomycetales;f__Corynebacteriaceae;g__Corynebacterium	0.0303176	0.0172249	0.0344274
k__Bacteria;p__Actinobacteria;c__Actinobacteria;o__Actinomycetales;f__Brevibacteriaceae;g__Brevibacterium	0.0240876	0.0007114	0.0281638
k__Bacteria;p__Proteobacteria;c__Gammaproteobacteria;o__Pseudomonadales;f__Pseudomonadaceae;g__Pseudomonas	0.0240284	0.00219549	0.0132376
k__Bacteria;p__Actinobacteria;c__Actinobacteria;o__Actinomycetales;f__Bogoriellaceae;g__Georgenia	0.0236099	0.000378503	0.0130064
k__Bacteria;p__Proteobacteria;c__Betaproteobacteria;o__Burkholderiales;f__Burkholderiaceae;g__Lautropia	0.0234405	0.0470589	0.0472993
k__Bacteria;p__Firmicutes;c__Bacilli;o__Bacillales;f__Bacillaceae;g__	0.0225717	0.00832316	0.0126538
k__Bacteria;p__Firmicutes;c__Bacilli;o__Bacillales;f__Staphylococcaceae;g__Salinicoccus	0.0198683	0.0177079	0.00650727
k__Bacteria;p__Proteobacteria;c__Gammaproteobacteria;o__Enterobacteriales;f__Enterobacteriaceae;g__Erwinia	0.0187012	0.0011032	0.00916378
k__Bacteria;p__Firmicutes;c__Bacilli;o__Lactobacillales;f__Aerococcaceae;g__Alkalibacterium	0.0185925	0.000436789	0.00341822
k__Bacteria;p__Actinobacteria;c__Actinobacteria;o__Actinomycetales;f__Dietziaceae;Other	0.0184399	0.000153295	0.0293576
k__Bacteria;p__Proteobacteria;c__Alphaproteobacteria;o__Rickettsiales;f__mitochondria;Other	0.0177054	0.0138367	0.00835121
k__Bacteria;p__Proteobacteria;c__Betaproteobacteria;o__Neisseriales;f__Neisseriaceae;g__Neisseria	0.0161171	0.00831951	0.0385851
k__Bacteria;p__Actinobacteria;c__Actinobacteria;o__Actinomycetales;Other;Other	0.0155435	0.00090367	0.00465449
k__Bacteria;p__Firmicutes;c__Bacilli;o__Lactobacillales;f__Aerococcaceae;g__Marinilactibacillus	0.0149218	0.000267535	0.00649958
k__Bacteria;p__Actinobacteria;c__Actinobacteria;o__Actinomycetales;f__Microbacteriaceae;g__Leucobacter	0.0128996	8.44891e-05	0.00191488
k__Bacteria;p__Actinobacteria;c__Actinobacteria;o__Actinomycetales;f__Pseudonocardiaceae;g__Pseudonocardia	0.0117015	0.00209277	0.0804452
k__Bacteria;p__Proteobacteria;c__Gammaproteobacteria;o__Pasteurellales;f__Pasteurellaceae;g__Aggregatibacter	0.0109006	0.019513	0.0292258
k__Bacteria;p__Fusobacteria;c__Fusobacteriia;o__Fusobacteriales;f__Leptotrichiaceae;g__Leptotrichia	0.0102742	0.00791027	0.0114719
k__Bacteria;p__Proteobacteria;c__Gammaproteobacteria;o__Alteromonadales;f__Idiomarinaceae;g__	0.00870062	0	0.00145183
k__Bacteria;p__Actinobacteria;c__Actinobacteria;o__Actinomycetales;f__Microbacteriaceae;Other	0.0085756	0.000985537	0.00120803
k__Bacteria;p__Actinobacteria;c__Actinobacteria;o__Actinomycetales;f__Micrococcaceae;g__Kocuria	0.00783077	0.0496914	0.0178584
k__Bacteria;p__Proteobacteria;c__Gammaproteobacteria;o__Pasteurellales;f__Pasteurellaceae;g__Haemophilus	0.00577535	0.00551033	0.00354831
k__Bacteria;p__Actinobacteria;c__Actinobacteria;o__Actinomycetales;f__Actinomycetaceae;g__Actinomyces	0.0054416	0.0156265	0.00820971
k__Bacteria;p__Actinobacteria;c__Actinobacteria;o__Actinomycetales;f__Dermabacteraceae;g__Brachybacterium	0.00371783	0.00280934	0.00773933
k__Bacteria;p__Actinobacteria;c__Actinobacteria;o__Actinomycetales;f__Microbacteriaceae;g__	0.00370482	0.000174481	0.000689175
k__Bacteria;p__Actinobacteria;c__Actinobacteria;o__Actinomycetales;f__Micrococcaceae;g__Rothia	0.00346271	0.000701589	0.00154148
k__Bacteria;p__Proteobacteria;c__Gammaproteobacteria;o__Enterobacteriales;f__Enterobacteriaceae;g__Citrobacter	0.00320551	0.000135796	0.000934798
k__Bacteria;p__Proteobacteria;c__Betaproteobacteria;o__Neisseriales;f__Neisseriaceae;Other	0.00311528	0.00318674	0.000572924
k__Bacteria;p__Actinobacteria;c__Actinobacteria;o__Actinomycetales;f__Yaniellaceae;Other	0.00304656	2.16024e-05	0.00120935
k__Bacteria;p__Firmicutes;c__Clostridia;o__Clostridiales;f__;g__	0.00300714	0.00203203	0.00301566
k__Bacteria;p__Firmicutes;c__Clostridia;o__Clostridiales;f__Clostridiaceae;g__	0.00298911	0.00986414	0.00111597
k__Bacteria;p__Firmicutes;c__Clostridia;o__Clostridiales;f__Veillonellaceae;g__Veillonella	0.00285305	0.000904876	0.00165
k__Bacteria;p__Proteobacteria;c__Gammaproteobacteria;o__Pseudomonadales;f__Moraxellaceae;g__Moraxella	0.00257713	0.000242721	0.000201052
k__Bacteria;p__Bacteroidetes;c__Bacteroidia;o__Bacteroidales;f__Bacteroidaceae;g__Bacteroides	0.00253729	0.00164873	0.00264701
k__Bacteria;p__Actinobacteria;c__Actinobacteria;o__Actinomycetales;f__Propionibacteriaceae;g__Propionibacterium	0.00221021	0.0026277	0.011633
k__Bacteria;p__Firmicutes;c__Clostridia;o__Clostridiales;f__Ruminococcaceae;g__Faecalibacterium	0.00217459	0.000566174	0.000922378
k__Bacteria;p__Firmicutes;c__Bacilli;o__Gemellales;f__Gemellaceae;g__	0.00195463	0.00216385	0.000833426
k__Bacteria;p__Firmicutes;c__Bacilli;o__Lactobacillales;f__Aerococcaceae;Other	0.00186253	0.00327077	0.000956064
k__Bacteria;p__Bacteroidetes;c__Flavobacteriia;o__Flavobacteriales;f__[Weeksellaceae];g__	0.00181456	0.00329848	0.00363455
k__Bacteria;p__Fusobacteria;c__Fusobacteriia;o__Fusobacteriales;f__Fusobacteriaceae;g__Fusobacterium	0.00175137	0.00104209	0.0015721
k__Bacteria;p__Proteobacteria;c__Gammaproteobacteria;o__Enterobacteriales;f__Enterobacteriaceae;Other	0.00170942	0.000375418	0.00152265
k__Bacteria;p__Firmicutes;c__Clostridia;o__Clostridiales;f__Ruminococcaceae;g__	0.0017091	0.00321946	0.00177995
k__Bacteria;p__Firmicutes;c__Bacilli;o__Lactobacillales;f__Leuconostocaceae;g__Leuconostoc	0.00170298	0.00145622	0.00792709
k__Bacteria;p__Actinobacteria;c__Actinobacteria;o__Actinomycetales;f__Pseudonocardiaceae;g__Actinomycetospora	0.00165098	7.92184e-05	0.0122762
k__Bacteria;p__Proteobacteria;c__Betaproteobacteria;o__Neisseriales;f__Neisseriaceae;g__Kingella	0.00163261	0.0016498	0.00756058
k__Bacteria;p__Proteobacteria;c__Gammaproteobacteria;o__Cardiobacteriales;f__Cardiobacteriaceae;g__Cardiobacterium	0.00161894	0.00267455	0.00852391
k__Bacteria;p__Actinobacteria;c__Actinobacteria;o__Actinomycetales;f__Micrococcaceae;g__	0.00154635	0.015009	0.00215597
k__Bacteria;p__Firmicutes;c__Clostridia;o__Clostridiales;f__Lachnospiraceae;g__	0.00149629	0.00125249	0.00172596
k__Bacteria;p__Proteobacteria;c__Betaproteobacteria;o__Burkholderiales;f__Comamonadaceae;g__	0.001492	0.00469579	0.00667178
k__Bacteria;p__Bacteroidetes;c__Flavobacteriia;o__Flavobacteriales;f__Flavobacteriaceae;g__Capnocytophaga	0.00149105	0.000896984	0.00396565
k__Bacteria;p__Actinobacteria;c__Actinobacteria;o__Actinomycetales;f__Gordoniaceae;g__Gordonia	0.00145578	0.00141451	0.00110436
k__Bacteria;p__Bacteroidetes;c__Bacteroidia;o__Bacteroidales;f__Prevotellaceae;g__Prevotella	0.00140438	0.00250047	0.00174371
k__Bacteria;p__Bacteroidetes;c__Flavobacteriia;o__Flavobacteriales;f__Flavobacteriaceae;g__	0.00135174	0.000375766	3.95901e-05
k__Bacteria;p__Firmicutes;c__Bacilli;o__Lactobacillales;f__Leuconostocaceae;g__	0.00129166	5.08658e-05	0.0041095
k__Bacteria;p__Firmicutes;c__Clostridia;o__Clostridiales;f__[Tissierellaceae];g__Finegoldia	0.00119492	0.000185643	0.000809771
k__Bacteria;p__Actinobacteria;c__Actinobacteria;o__Actinomycetales;f__Propionibacteriaceae;g__	0.00113718	0.00111601	0.0028458
k__Bacteria;p__Firmicutes;c__Bacilli;o__Lactobacillales;f__Aerococcaceae;g__Facklamia	0.00110304	0.000125183	0.000263776
k__Bacteria;p__Firmicutes;c__Clostridia;o__Clostridiales;f__[Tissierellaceae];g__Peptoniphilus	0.00109396	0.00041997	0.000610487
Unassigned;Other;Other;Other;Other;Other	0.00102683	0.00633161	0.00169116
k__Bacteria;p__Proteobacteria;c__Gammaproteobacteria;o__Pasteurellales;f__Pasteurellaceae;Other	0.000977156	0.00496747	0.000269283
k__Bacteria;p__Bacteroidetes;c__Bacteroidia;o__Bacteroidales;f__Porphyromonadaceae;g__Porphyromonas	0.000970991	0.000597409	0.00104207
k__Bacteria;p__Firmicutes;c__Bacilli;o__Lactobacillales;Other;Other	0.000924428	0.00491258	0.000702101
k__Bacteria;p__Firmicutes;c__Bacilli;o__Lactobacillales;f__Streptococcaceae;g__Lactococcus	0.000890511	0.00276242	0.00378047
k__Archaea;p__Euryarchaeota;c__Halobacteria;o__Halobacteriales;f__Halobacteriaceae;Other	0.000798751	0	0.00152815
k__Bacteria;p__Firmicutes;c__Bacilli;o__Bacillales;f__Bacillaceae;g__Bacillus	0.000789831	0.000278895	0.000302213
k__Bacteria;p__Firmicutes;c__Bacilli;o__Lactobacillales;f__Leuconostocaceae;g__Weissella	0.000770436	0.000110299	0.000506043
k__Bacteria;p__Firmicutes;c__Bacilli;o__Bacillales;f__Staphylococcaceae;g__Jeotgalicoccus	0.00076688	0.00244701	0.000401956
k__Bacteria;p__Firmicutes;c__Clostridia;o__Clostridiales;f__[Tissierellaceae];g__Anaerococcus	0.000764562	0.00103113	0.000474174
k__Bacteria;p__Actinobacteria;c__Actinobacteria;o__Actinomycetales;f__;g__	0.000718771	0.00249639	0.000758461
k__Bacteria;p__Actinobacteria;c__Actinobacteria;o__Bifidobacteriales;f__Bifidobacteriaceae;g__Bifidobacterium	0.000716503	0.00071534	0.000331602
k__Bacteria;p__Proteobacteria;c__Alphaproteobacteria;o__Sphingomonadales;f__Sphingomonadaceae;Other	0.000713123	0.00131515	0.00458512
k__Bacteria;p__Firmicutes;c__Clostridia;o__Clostridiales;f__Lachnospiraceae;g__Coprococcus	0.000701879	0.000290018	0.000492815
k__Bacteria;p__Firmicutes;c__Bacilli;o__Bacillales;f__[Exiguobacteraceae];g__Exiguobacterium	0.000688522	6.33353e-05	0.000386478
k__Bacteria;p__TM7;c__TM7-3;o__;f__;g__	0.000677544	0.00268129	0.00459636
k__Bacteria;p__Actinobacteria;c__Actinobacteria;o__Actinomycetales;f__Actinomycetaceae;g__N09	0.000658703	0.000124315	0.000220095
k__Archaea;p__Euryarchaeota;c__Halobacteria;o__Halobacteriales;f__Halobacteriaceae;g__	0.000649154	0	0.000912803
k__Bacteria;p__Actinobacteria;c__Nitriliruptoria;o__Nitriliruptorales;f__Nitriliruptoraceae;g__	0.000614739	0	0.000497636
k__Bacteria;p__Bacteroidetes;c__Sphingobacteriia;o__Sphingobacteriales;f__Sphingobacteriaceae;g__	0.00060291	0.000311461	8.34887e-05
k__Bacteria;p__TM7;c__TM7-3;o__CW040;f__;g__	0.000586476	0	0.000644335
k__Bacteria;p__Firmicutes;c__Bacilli;o__Lactobacillales;f__Carnobacteriaceae;g__Granulicatella	0.000565646	0	0.0001811
k__Bacteria;p__Actinobacteria;c__Rubrobacteria;o__Rubrobacterales;f__Rubrobacteraceae;g__Rubrobacter	0.000558403	4.24344e-05	0.00497662
k__Bacteria;p__Proteobacteria;c__Betaproteobacteria;o__Burkholderiales;f__Comamonadaceae;Other	0.000547453	0.00133768	0.000528952
k__Bacteria;p__Actinobacteria;c__Actinobacteria;o__Actinomycetales;f__Nocardioidaceae;g__	0.00052143	0.00318929	0.00182448
k__Bacteria;p__Firmicutes;c__Bacilli;o__Bacillales;f__Alicyclobacillaceae;g__Alicyclobacillus	0.000502132	0.00582729	0.00500212
k__Bacteria;p__Proteobacteria;c__Alphaproteobacteria;o__Rhodobacterales;f__Rhodobacteraceae;g__	0.000429683	0.00252204	1.73041e-05
k__Bacteria;p__Firmicutes;c__Clostridia;o__Clostridiales;f__Lachnospiraceae;g__Roseburia	0.000426018	9.0396e-06	0.000206528
k__Bacteria;p__Actinobacteria;c__Actinobacteria;o__Actinomycetales;f__Pseudonocardiaceae;g__Saccharopolyspora	0.000401932	6.38283e-05	0.00175571
k__Bacteria;p__Bacteroidetes;c__Bacteroidia;o__Bacteroidales;f__[Paraprevotellaceae];g__[Prevotella]	0.000395845	0.000193194	0.000682191
k__Bacteria;p__Proteobacteria;c__Gammaproteobacteria;o__Pseudomonadales;f__Pseudomonadaceae;Other	0.000391854	7.02062e-05	2.09717e-05
k__Bacteria;p__Proteobacteria;c__Gammaproteobacteria;o__Pasteurellales;f__Pasteurellaceae;g__Actinobacillus	0.000377875	0.00160099	0.000187571
k__Bacteria;p__Firmicutes;c__Clostridia;o__Clostridiales;f__Lachnospiraceae;g__Blautia	0.000363757	0.000136471	3.8437e-05
k__Bacteria;p__Actinobacteria;c__Actinobacteria;o__Actinomycetales;f__Dermabacteraceae;g__	0.000353369	0.000248153	0.000374844
k__Bacteria;p__Firmicutes;c__Clostridia;o__Clostridiales;f__Lachnospiraceae;g__Lachnospira	0.000351578	8.47513e-05	0.000203385
k__Bacteria;p__Actinobacteria;c__Actinobacteria;o__Actinomycetales;f__Micrococcaceae;g__Arthrobacter	0.000347617	0.000993429	0.00125523
k__Bacteria;p__Firmicutes;c__Clostridia;o__Clostridiales;f__[Tissierellaceae];g__WAL_1855D	0.000344117	0.000200516	0.000542419
k__Bacteria;p__Firmicutes;c__Clostridia;o__Clostridiales;f__Ruminococcaceae;g__Ruminococcus	0.000339215	0.000730191	0.00032293
k__Bacteria;p__Proteobacteria;c__Alphaproteobacteria;o__Sphingomonadales;f__Sphingomonadaceae;g__Sphingomonas	0.00033308	0.00827131	0.00134827
k__Bacteria;p__Proteobacteria;c__Alphaproteobacteria;o__Sphingomonadales;f__Sphingomonadaceae;g__	0.000327759	0.00373864	0.00200685
k__Bacteria;p__Firmicutes;c__Erysipelotrichi;o__Erysipelotrichales;f__Erysipelotrichaceae;g__	0.000326152	0.000234791	0.000428838
k__Bacteria;p__Firmicutes;c__Clostridia;o__Clostridiales;f__Christensenellaceae;g__	0.000283098	0.000178154	0.000567209
k__Bacteria;p__Proteobacteria;c__Gammaproteobacteria;o__Pseudomonadales;f__Moraxellaceae;g__	0.000280825	0.000737456	0.000179712
k__Bacteria;p__Actinobacteria;c__Nitriliruptoria;o__Euzebyales;f__Euzebyaceae;g__Euzebya	0.00025998	0	0.000214576
k__Bacteria;p__Tenericutes;c__Mollicutes;o__RF39;f__;g__	0.00025271	0.000101537	0.000251104
k__Bacteria;p__Proteobacteria;c__Gammaproteobacteria;o__Salinisphaerales;f__Salinisphaeraceae;g__Salinisphaera	0.000248524	0	0.000717295
k__Bacteria;p__Chloroflexi;c__Thermomicrobia;o__JG30-KF-CM45;f__;g__	0.00022759	0.00117392	0.000579039
k__Bacteria;p__Firmicutes;c__Bacilli;o__Lactobacillales;f__Aerococcaceae;g__	0.000227089	0.000849935	0
k__Bacteria;p__Actinobacteria;c__Actinobacteria;o__Actinomycetales;f__Intrasporangiaceae;Other	0.000212464	0.00187705	0.00167647
k__Bacteria;p__Proteobacteria;c__Betaproteobacteria;o__Burkholderiales;f__Oxalobacteraceae;Other	0.000203206	0.00117995	0.00012211
k__Bacteria;p__Bacteroidetes;c__Bacteroidia;o__Bacteroidales;f__Rikenellaceae;g__	0.000194859	6.55929e-05	0.000573578
k__Bacteria;p__Proteobacteria;c__Gammaproteobacteria;o__Oceanospirillales;f__Alcanivoracaceae;g__Alcanivorax	0.000182857	0	0
k__Bacteria;p__Firmicutes;c__Clostridia;o__Clostridiales;f__Ruminococcaceae;Other	0.00017702	4.82487e-05	0.000251219
k__Bacteria;p__Actinobacteria;c__Actinobacteria;o__Actinomycetales;f__Dermatophilaceae;Other	0.000171847	0.0122656	0.000266254
k__Bacteria;p__Actinobacteria;c__Actinobacteria;o__Actinomycetales;f__Microbacteriaceae;g__Curtobacterium	0.000169276	0.00092685	0.000107982
k__Bacteria;p__Verrucomicrobia;c__Verrucomicrobiae;o__Verrucomicrobiales;f__Verrucomicrobiaceae;g__Akkermansia	0.000161104	4.05393e-05	0.000335892
k__Bacteria;p__Firmicutes;c__Clostridia;o__Clostridiales;f__[Tissierellaceae];g__ph2	0.000160281	0	3.42837e-05
k__Bacteria;p__Actinobacteria;c__Actinobacteria;o__Actinomycetales;f__Dermacoccaceae;g__Dermacoccus	0.000159391	0.000227617	0.000866728
k__Bacteria;p__Firmicutes;c__Clostridia;o__Clostridiales;f__Lachnospiraceae;g__[Ruminococcus]	0.000150573	0.000475112	0.000132531
k__Bacteria;p__Proteobacteria;c__Epsilonproteobacteria;o__Campylobacterales;f__Campylobacteraceae;g__Campylobacter	0.000149071	0.000319246	0.000175333
k__Bacteria;p__Proteobacteria;c__Alphaproteobacteria;o__Rhodobacterales;f__Rhodobacteraceae;g__Paracoccus	0.000145481	0.0101086	0.00178706
k__Bacteria;p__Firmicutes;c__Clostridia;o__Clostridiales;f__Clostridiaceae;g__Clostridium	0.0001437	0.000769955	0.000347613
k__Bacteria;p__Proteobacteria;c__Alphaproteobacteria;o__Rhodospirillales;f__Acetobacteraceae;g__Gluconobacter	0.000139791	0	0.000133014
k__Bacteria;p__Proteobacteria;c__Alphaproteobacteria;o__Rhizobiales;f__Aurantimonadaceae;g__	0.00013761	6.57598e-05	5.08493e-05
k__Bacteria;p__Proteobacteria;c__Gammaproteobacteria;o__Pasteurellales;f__Pasteurellaceae;g__	0.000132468	0	0.00143661
k__Bacteria;p__Firmicutes;c__Clostridia;o__Clostridiales;f__Ruminococcaceae;g__Oscillospira	0.000132042	0.000236064	0.000311018
k__Bacteria;p__Bacteroidetes;c__Bacteroidia;o__Bacteroidales;f__Porphyromonadaceae;g__Parabacteroides	0.00012812	4.24588e-05	0.000536875
k__Bacteria;p__Firmicutes;c__Bacilli;o__Lactobacillales;f__Aerococcaceae;g__Aerococcus	0.00012772	0.000107971	0.000146727
k__Bacteria;p__Proteobacteria;c__Betaproteobacteria;o__Burkholderiales;f__Alcaligenaceae;g__Sutterella	0.000127079	9.94352e-05	0
k__Bacteria;p__Actinobacteria;c__Actinobacteria;o__Actinomycetales;f__Intrasporangiaceae;g__Serinicoccus	0.000117445	0.000100512	0.000250583
k__Bacteria;p__Firmicutes;c__Clostridia;o__Clostridiales;f__[Tissierellaceae];g__1-68	0.000117174	7.6016e-05	0.000174463
k__Bacteria;p__Actinobacteria;c__Actinobacteria;o__Actinomycetales;f__Intrasporangiaceae;g__	0.00011378	0.00376614	0.00266287
k__Bacteria;p__Lentisphaerae;c__[Lentisphaeria];o__Victivallales;f__Victivallaceae;g__	0.000112669	6.6872e-06	0.000142981
k__Bacteria;p__Bacteroidetes;c__Flavobacteriia;o__Flavobacteriales;f__Blattabacteriaceae;g__Blattabacterium	0.000111732	0	0.000979894
k__Bacteria;p__Actinobacteria;c__Coriobacteriia;o__Coriobacteriales;f__Coriobacteriaceae;g__Collinsella	0.000104098	9.7901e-06	6.72472e-05
k__Bacteria;p__Actinobacteria;c__Actinobacteria;o__Actinomycetales;f__Actinomycetaceae;g__Mobiluncus	0.000103311	0	9.81052e-05
k__Bacteria;p__Actinobacteria;c__Actinobacteria;o__Actinomycetales;f__Microbacteriaceae;g__Agrococcus	0.000101378	0.000380166	0.000218066
k__Bacteria;p__Bacteroidetes;c__Sphingobacteriia;o__Sphingobacteriales;f__;g__	9.99778e-05	0.000210573	0.000271758
k__Bacteria;p__Firmicutes;c__Clostridia;o__Clostridiales;f__Veillonellaceae;g__Megamonas	9.78016e-05	1.22376e-05	8.59727e-06
k__Bacteria;p__Actinobacteria;c__Actinobacteria;o__Actinomycetales;f__ACK-M1;g__	9.69326e-05	3.94918e-05	0.000196683
k__Bacteria;p__Actinobacteria;c__Actinobacteria;o__Bifidobacteriales;f__Bifidobacteriaceae;Other	9.59383e-05	0.000419952	0.000342767
k__Bacteria;p__Proteobacteria;c__Gammaproteobacteria;o__Pseudomonadales;f__Moraxellaceae;g__Perlucidibaca	9.22258e-05	0.00010855	9.98961e-05
k__Bacteria;p__Planctomycetes;c__Phycisphaerae;o__Phycisphaerales;f__;g__	9.13659e-05	1.48504e-05	0
k__Bacteria;p__Proteobacteria;c__Gammaproteobacteria;o__Enterobacteriales;f__Enterobacteriaceae;g__Enterobacter	8.78482e-05	0.000422918	0.000227886
k__Bacteria;p__Firmicutes;c__Clostridia;o__Clostridiales;Other;Other	8.62475e-05	0.000277665	8.15615e-05
k__Bacteria;p__Proteobacteria;c__Alphaproteobacteria;o__Rhizobiales;f__;g__	8.61625e-05	0.00166384	0.000106444
k__Bacteria;p__Bacteroidetes;c__Bacteroidia;o__Bacteroidales;f__[Barnesiellaceae];g__	8.61335e-05	0.000256733	2.22731e-05
k__Bacteria;p__Firmicutes;c__Bacilli;o__Lactobacillales;f__Enterococcaceae;g__Enterococcus	8.50344e-05	0.000208169	0.00120382
k__Bacteria;p__Bacteroidetes;c__Cytophagia;o__Cytophagales;f__Cytophagaceae;g__Spirosoma	8.37476e-05	0.00112449	0.000395539
k__Bacteria;p__Firmicutes;c__Clostridia;o__Clostridiales;f__Lachnospiraceae;g__Oribacterium	8.3696e-05	0	2.93604e-05
k__Bacteria;p__Firmicutes;c__Clostridia;o__Clostridiales;f__Peptostreptococcaceae;g__	8.26714e-05	0.000190914	0.000165566
k__Bacteria;p__Bacteroidetes;c__Cytophagia;o__Cytophagales;f__Cytophagaceae;g__Hymenobacter	8.00119e-05	0.0012658	0.00110619
k__Bacteria;p__Firmicutes;c__Bacilli;o__Bacillales;f__Staphylococcaceae;g__Staphylococcus	7.79394e-05	7.51645e-05	0.000725125
k__Bacteria;p__Actinobacteria;c__Actinobacteria;o__Actinomycetales;f__Actinomycetaceae;g__Varibaculum	7.7407e-05	0	3.53392e-06
k__Bacteria;p__Proteobacteria;c__Betaproteobacteria;o__Rhodocyclales;f__Rhodocyclaceae;g__Dechloromonas	7.73994e-05	0.000195862	1.88335e-05
k__Bacteria;p__Proteobacteria;c__Alphaproteobacteria;o__Sphingomonadales;f__Erythrobacteraceae;g__	7.69953e-05	0.00105775	0.000193887
k__Bacteria;p__Actinobacteria;c__Actinobacteria;o__Actinomycetales;f__Micrococcaceae;g__Micrococcus	7.53778e-05	0.00336943	8.05829e-05
k__Bacteria;p__Proteobacteria;c__Betaproteobacteria;o__Burkholderiales;f__Comamonadaceae;g__Roseateles	7.34372e-05	0.000131962	3.54655e-05
k__Bacteria;p__Proteobacteria;c__Alphaproteobacteria;o__Rhizobiales;f__Bradyrhizobiaceae;g__	7.04226e-05	0.000628073	0.000363912
k__Bacteria;p__Firmicutes;c__Clostridia;o__Clostridiales;f__Lachnospiraceae;Other	6.96895e-05	0.000221322	0.000124532
k__Bacteria;p__Proteobacteria;c__Alphaproteobacteria;o__Rhizobiales;f__Rhizobiaceae;g__Agrobacterium	6.916e-05	0.00187836	0
k__Bacteria;p__Firmicutes;c__Clostridia;o__Clostridiales;f__[Tissierellaceae];g__Parvimonas	6.7056e-05	0	0
k__Bacteria;p__Bacteroidetes;c__Flavobacteriia;o__Flavobacteriales;f__[Weeksellaceae];g__Wautersiella	6.55151e-05	0	0
k__Bacteria;p__Firmicutes;c__Clostridia;o__Clostridiales;f__Veillonellaceae;g__Phascolarctobacterium	6.50853e-05	2.14506e-05	9.94229e-05
k__Bacteria;p__Bacteroidetes;c__Bacteroidia;o__Bacteroidales;f__Porphyromonadaceae;g__Paludibacter	6.50744e-05	0.000199119	0.000109204
k__Bacteria;p__Proteobacteria;c__Gammaproteobacteria;o__Xanthomonadales;f__Xanthomonadaceae;g__	6.4765e-05	0.00443832	0.000875984
k__Bacteria;p__Tenericutes;c__Mollicutes;o__Mycoplasmatales;f__Mycoplasmataceae;g__Mycoplasma	6.44093e-05	0.000850203	0
k__Bacteria;p__Proteobacteria;c__Gammaproteobacteria;o__Alteromonadales;f__[Chromatiaceae];g__Rheinheimera	6.36983e-05	4.78867e-05	9.67329e-05
k__Bacteria;p__Actinobacteria;c__Actinobacteria;o__Actinomycetales;f__Actinomycetaceae;g__	6.34893e-05	2.34052e-05	0
k__Bacteria;p__Proteobacteria;c__Gammaproteobacteria;o__Enterobacteriales;f__Enterobacteriaceae;g__Serratia	6.19753e-05	5.65002e-05	0.00016955
k__Bacteria;p__Firmicutes;c__Bacilli;o__Lactobacillales;f__;g__	5.95223e-05	7.26654e-06	0.000697949
k__Bacteria;p__Actinobacteria;c__Actinobacteria;o__Actinomycetales;f__Microbacteriaceae;g__Microbacterium	5.94237e-05	0.00138704	0.000164854
k__Bacteria;p__Chloroflexi;c__Thermomicrobia;o__;f__;g__	5.71256e-05	0	1.01305e-05
k__Bacteria;p__Bacteroidetes;c__Bacteroidia;o__Bacteroidales;f__Porphyromonadaceae;g__Tannerella	5.45157e-05	0	4.74862e-05
k__Bacteria;p__GN02;c__BD1-5;o__;f__;g__	5.18657e-05	3.34715e-05	0.000725985
k__Bacteria;p__Verrucomicrobia;c__Verruco-5;o__WCHB1-41;f__RFP12;g__	5.15278e-05	0.000198578	0.000140576
k__Bacteria;p__Proteobacteria;c__Gammaproteobacteria;o__Pseudomonadales;f__Moraxellaceae;g__Enhydrobacter	5.09481e-05	0.00119374	0.000623803
k__Bacteria;p__Proteobacteria;c__Alphaproteobacteria;o__Caulobacterales;f__Caulobacteraceae;g__	5.05114e-05	0.00108817	0.000484167
k__Bacteria;p__Actinobacteria;c__Coriobacteriia;o__Coriobacteriales;f__Coriobacteriaceae;g__	5.02176e-05	0.000222285	3.92664e-05
k__Bacteria;p__Firmicutes;c__Clostridia;o__Clostridiales;f__Peptococcaceae;g__Peptococcus	5.02176e-05	0	7.38941e-05
k__Bacteria;p__Firmicutes;c__Clostridia;o__Clostridiales;f__[Mogibacteriaceae];g__	5.02176e-05	0.000474407	9.06314e-05
k__Bacteria;p__Proteobacteria;c__Betaproteobacteria;o__Rhodocyclales;f__Rhodocyclaceae;g__	5.01485e-05	3.13509e-05	0
k__Bacteria;p__Proteobacteria;c__Deltaproteobacteria;o__FAC87;f__;g__	4.94167e-05	0	0.000300616
k__Bacteria;p__Firmicutes;c__Clostridia;o__Clostridiales;f__Veillonellaceae;g__Succiniclasticum	4.64746e-05	0	5.22682e-05
k__Bacteria;p__Proteobacteria;c__Betaproteobacteria;o__Burkholderiales;f__Comamonadaceae;g__Limnohabitans	4.62181e-05	0.00104471	0.000655481
k__Bacteria;p__Firmicutes;c__Clostridia;o__Clostridiales;f__Veillonellaceae;g__Dialister	4.55624e-05	0.000183124	0.00034578
k__Bacteria;p__Firmicutes;c__Clostridia;o__Clostridiales;f__[Tissierellaceae];g__Gallicola	4.47676e-05	0	0
k__Bacteria;p__Proteobacteria;c__Gammaproteobacteria;o__Pseudomonadales;f__Pseudomonadaceae;g__	4.30806e-05	0.000240947	0.000278446
k__Bacteria;p__Proteobacteria;c__Alphaproteobacteria;o__Rhizobiales;f__Phyllobacteriaceae;g__	4.28719e-05	0.000132873	0
k__Bacteria;p__Proteobacteria;c__Alphaproteobacteria;o__Rhizobiales;f__Methylobacteriaceae;g__	4.15009e-05	0.000139307	6.72355e-05
k__Bacteria;p__Actinobacteria;c__Actinobacteria;o__Actinomycetales;f__Intrasporangiaceae;g__Janibacter	4.11096e-05	0	0.00156458
k__Bacteria;p__Actinobacteria;c__Actinobacteria;o__Actinomycetales;f__Mycobacteriaceae;g__Mycobacterium	3.62245e-05	0.00282406	0.000430584
k__Bacteria;p__Firmicutes;c__Clostridia;o__Clostridiales;f__Veillonellaceae;g__Selenomonas	3.38677e-05	2.31653e-05	4.19435e-06
k__Bacteria;p__Chloroflexi;c__Anaerolineae;o__SBR1031;f__A4b;g__	3.34784e-05	4.67599e-05	0
k__Bacteria;p__Firmicutes;c__Bacilli;o__Lactobacillales;f__Enterococcaceae;Other	3.26523e-05	0.000110248	0
k__Bacteria;p__Actinobacteria;c__Actinobacteria;o__Actinomycetales;f__Nocardiaceae;g__Rhodococcus	3.21121e-05	0.00239034	8.26582e-05
k__Bacteria;p__Actinobacteria;c__Actinobacteria;o__Actinomycetales;f__Propionibacteriaceae;g__Microlunatus	3.20859e-05	0.000688456	0
k__Bacteria;p__Proteobacteria;c__Deltaproteobacteria;o__Desulfovibrionales;f__Desulfovibrionaceae;g__Bilophila	3.07057e-05	0	0
k__Bacteria;p__Firmicutes;c__Bacilli;o__Bacillales;f__Listeriaceae;Other	3.04172e-05	1.92995e-06	0
k__Bacteria;p__Proteobacteria;c__Alphaproteobacteria;o__Rhodobacterales;f__Rhodobacteraceae;g__Rubellimicrobium	2.7933e-05	0.000456241	1.43911e-05
k__Bacteria;p__Cyanobacteria;c__4C0d-2;o__MLE1-12;f__;g__	2.79304e-05	0.000184687	2.0261e-05
k__Bacteria;p__Firmicutes;c__Clostridia;o__Clostridiales;f__[Mogibacteriaceae];g__Mogibacterium	2.63675e-05	0.000446542	0
k__Bacteria;p__Tenericutes;c__Mollicutes;o__Anaeroplasmatales;f__Anaeroplasmataceae;g__	2.62521e-05	0	0
k__Bacteria;p__Firmicutes;c__Bacilli;o__Bacillales;f__Paenibacillaceae;g__Paenibacillus	2.48062e-05	0.000178398	3.03914e-05
k__Bacteria;p__Cyanobacteria;c__Chloroplast;o__Stramenopiles;f__;g__	2.45806e-05	0.000179728	0.000195442
k__Bacteria;p__Firmicutes;c__Clostridia;o__Clostridiales;f__Veillonellaceae;Other	2.40652e-05	0	4.19435e-06
k__Bacteria;p__Actinobacteria;c__Actinobacteria;o__Actinomycetales;f__Dietziaceae;g__Dietzia	2.34728e-05	0.00155792	0.00058664
k__Bacteria;p__Planctomycetes;c__Planctomycetia;o__Gemmatales;f__Gemmataceae;g__Gemmata	2.31106e-05	0.000344814	2.58292e-05
k__Bacteria;p__Proteobacteria;c__Gammaproteobacteria;o__Pasteurellales;f__Pasteurellaceae;g__Pasteurella	2.07015e-05	5.67338e-05	0.000355021
k__Archaea;p__Euryarchaeota;c__Methanobacteria;o__Methanobacteriales;f__Methanobacteriaceae;g__Methanobrevibacter	2.04022e-05	7.72514e-05	1.85074e-05
k__Bacteria;p__Actinobacteria;c__Actinobacteria;o__Actinomycetales;f__Nocardioidaceae;g__Propionicimonas	2.01478e-05	0.0280654	0.000332195
k__Bacteria;p__Acidobacteria;c__[Chloracidobacteria];o__RB41;f__Ellin6075;g__	1.92567e-05	0.00407351	0.000184856
k__Bacteria;p__Bacteroidetes;c__Bacteroidia;o__Bacteroidales;f__Porphyromonadaceae;g__Dysgonomonas	1.92567e-05	6.94959e-05	0.000555327
k__Bacteria;p__Bacteroidetes;c__Cytophagia;o__Cytophagales;f__Cytophagaceae;g__Rudanella	1.92567e-05	9.60809e-05	0
k__Archaea;p__Euryarchaeota;c__Halobacteria;o__Halobacteriales;f__Halobacteriaceae;g__Halostagnicola	1.92125e-05	0	0.000119787
k__Bacteria;p__Actinobacteria;c__Actinobacteria;o__Actinomycetales;f__Beutenbergiaceae;g__Salana	1.85307e-05	0.000501217	8.37689e-06
k__Bacteria;p__Proteobacteria;c__Gammaproteobacteria;o__Alteromonadales;f__Alteromonadaceae;g__	1.75014e-05	0	0
k__Bacteria;p__Proteobacteria;c__Betaproteobacteria;o__Burkholderiales;f__Comamonadaceae;g__Delftia	1.69338e-05	1.18977e-05	0.000195238
k__Bacteria;p__Proteobacteria;c__Gammaproteobacteria;o__Xanthomonadales;f__Xanthomonadaceae;g__Thermomonas	1.69338e-05	0.000136932	4.46185e-05
k__Bacteria;p__Armatimonadetes;c__Armatimonadia;o__Armatimonadales;f__Armatimonadaceae;g__	1.67392e-05	0.000385847	8.8219e-05
k__Bacteria;p__Synergistetes;c__Synergistia;o__Synergistales;f__Dethiosulfovibrionaceae;g__TG5	1.67392e-05	5.81143e-05	0
k__Bacteria;p__Bacteroidetes;c__Bacteroidia;o__Bacteroidales;f__Porphyromonadaceae;g__Candidatus Azobacteroides	1.57387e-05	0	0.000149639
k__Bacteria;p__Proteobacteria;c__Alphaproteobacteria;o__Sphingomonadales;f__;g__	1.56752e-05	0.000554021	0
k__Bacteria;p__Proteobacteria;c__Betaproteobacteria;o__Burkholderiales;f__Comamonadaceae;g__Acidovorax	1.51636e-05	0.000326847	0.000152587
k__Bacteria;p__Proteobacteria;c__Alphaproteobacteria;o__Rhodobacterales;f__Rhodobacteraceae;g__Rhodobacter	1.48677e-05	0.00162914	0.000132082
k__Bacteria;p__Proteobacteria;c__Betaproteobacteria;o__Burkholderiales;f__Oxalobacteraceae;g__Janthinobacterium	1.45845e-05	0.00123188	0
k__Bacteria;p__Proteobacteria;c__Gammaproteobacteria;o__Xanthomonadales;f__Xanthomonadaceae;g__Luteimonas	1.45845e-05	0.00108939	2.12035e-05
k__Bacteria;p__Firmicutes;c__Clostridia;o__Clostridiales;f__Clostridiaceae;g__Alkaliphilus	1.39665e-05	9.14728e-05	3.53392e-06
k__Bacteria;p__Actinobacteria;c__Actinobacteria;o__Actinomycetales;f__Nocardioidaceae;g__Aeromicrobium	1.12892e-05	0.000293001	0
k__Bacteria;p__Firmicutes;c__Bacilli;o__Bacillales;f__Bacillaceae;g__Marinococcus	1.12892e-05	5.79133e-06	2.83254e-05
k__Bacteria;p__Firmicutes;c__Clostridia;o__Clostridiales;f__Veillonellaceae;g__Megasphaera	1.12892e-05	0.000106917	2.81008e-05
k__Bacteria;p__Proteobacteria;c__Alphaproteobacteria;o__Caulobacterales;f__Caulobacteraceae;g__Brevundimonas	1.12892e-05	0	9.5653e-05
k__Bacteria;p__Spirochaetes;c__Spirochaetes;o__Spirochaetales;f__Spirochaetaceae;g__Treponema	1.12892e-05	0.000244747	0
k__Bacteria;p__Actinobacteria;c__Thermoleophilia;o__Solirubrobacterales;f__Solirubrobacteraceae;g__	1.0989e-05	0.000320909	2.51307e-05
k__Bacteria;p__Proteobacteria;c__Gammaproteobacteria;o__Xanthomonadales;f__Sinobacteraceae;g__	1.04501e-05	0.000770685	6.70151e-05
k__Bacteria;p__Actinobacteria;c__Actinobacteria;o__Actinomycetales;f__Kineosporiaceae;g__	9.62835e-06	7.8646e-05	0.000117767
k__Bacteria;p__Bacteroidetes;c__Flavobacteriia;o__Flavobacteriales;f__Cryomorphaceae;g__Fluviicola	9.62835e-06	0.000189309	3.6982e-05
k__Bacteria;p__Proteobacteria;c__Alphaproteobacteria;o__RF32;f__;g__	9.62835e-06	0	1.02363e-05
k__Bacteria;p__Proteobacteria;c__Alphaproteobacteria;o__Rickettsiales;f__;g__	9.62835e-06	0	0
k__Bacteria;p__Proteobacteria;c__Betaproteobacteria;o__Neisseriales;f__Neisseriaceae;g__Vogesella	9.62835e-06	0.00177596	3.35076e-05
k__Bacteria;p__Actinobacteria;c__Actinobacteria;o__Actinomycetales;f__Intrasporangiaceae;g__Knoellia	9.30762e-06	7.15992e-05	7.06784e-06
k__Bacteria;p__Actinobacteria;c__Actinobacteria;o__Actinomycetales;f__Micrococcaceae;g__Microbispora	9.30762e-06	0.00799271	0.000265162
k__Bacteria;p__Proteobacteria;c__Betaproteobacteria;o__;f__;g__	7.8376e-06	0.000189079	6.56837e-05
k__Bacteria;p__Proteobacteria;c__Gammaproteobacteria;o__Alteromonadales;f__Alteromonadaceae;g__Cellvibrio	7.8376e-06	0.000223726	8.28721e-05
k__Bacteria;p__Proteobacteria;c__Alphaproteobacteria;o__Rhizobiales;f__Hyphomicrobiaceae;g__Devosia	7.32601e-06	0.000611621	0
k__Bacteria;p__Proteobacteria;c__Alphaproteobacteria;o__Rhizobiales;f__Rhizobiaceae;g__	7.32601e-06	0.000811732	0
k__Bacteria;p__Bacteroidetes;c__Flavobacteriia;o__Flavobacteriales;f__[Weeksellaceae];g__Chryseobacterium	6.27554e-06	0.00483121	0.000553596
k__Bacteria;p__Bacteroidetes;c__[Saprospirae];o__[Saprospirales];f__Chitinophagaceae;g__Sediminibacterium	6.27554e-06	0	3.03914e-05
k__Bacteria;p__Actinobacteria;c__Actinobacteria;o__Actinomycetales;f__Nocardiopsaceae;Other	5.64462e-06	0	0.000414443
k__Bacteria;p__Firmicutes;c__Bacilli;o__Bacillales;f__;g__	5.64462e-06	0.000280525	1.48127e-05
k__Bacteria;p__Proteobacteria;c__Alphaproteobacteria;o__Rhizobiales;f__Methylocystaceae;g__	5.64462e-06	0.00022458	0.000376255
k__Bacteria;p__Proteobacteria;c__Alphaproteobacteria;o__Sphingomonadales;f__Sphingomonadaceae;g__Sphingopyxis	5.64462e-06	0.000131745	1.67538e-05
k__Bacteria;p__Proteobacteria;c__Betaproteobacteria;o__Burkholderiales;f__Alcaligenaceae;Other	5.64462e-06	7.93685e-05	3.53392e-06
k__Bacteria;p__Proteobacteria;c__Betaproteobacteria;o__Burkholderiales;f__Oxalobacteraceae;g__	5.64462e-06	0.00354152	0.00147463
k__Bacteria;p__Proteobacteria;c__Deltaproteobacteria;o__Bdellovibrionales;f__Bacteriovoracaceae;g__	5.64462e-06	0.000182282	0.000114233
k__Bacteria;p__Proteobacteria;c__Gammaproteobacteria;o__Xanthomonadales;f__Xanthomonadaceae;g__Stenotrophomonas	5.64462e-06	2.56028e-05	8.87327e-05
k__Bacteria;p__Actinobacteria;c__Actinobacteria;o__Actinomycetales;f__Williamsiaceae;g__Williamsia	5.22507e-06	0.000118598	0
k__Bacteria;p__Planctomycetes;c__Phycisphaerae;o__WD2101;f__;g__	5.22507e-06	2.43027e-05	0
k__Bacteria;p__Proteobacteria;c__Alphaproteobacteria;o__;f__;g__	5.22507e-06	0.000210236	0
k__Bacteria;p__Actinobacteria;c__Actinobacteria;o__Actinomycetales;f__Nocardioidaceae;g__Friedmanniella	3.663e-06	0.000582904	0.000556274
k__Bacteria;p__Firmicutes;c__Bacilli;o__Bacillales;f__Planococcaceae;g__	3.663e-06	2.77502e-05	7.45472e-06
k__Bacteria;p__Firmicutes;c__Bacilli;o__Lactobacillales;f__Lactobacillaceae;g__Pediococcus	3.663e-06	0	4.98951e-05
k__Bacteria;p__Proteobacteria;c__Betaproteobacteria;o__Burkholderiales;f__Comamonadaceae;g__Comamonas	3.663e-06	0.000310059	0
k__Bacteria;p__Verrucomicrobia;c__[Spartobacteria];o__[Chthoniobacterales];f__[Chthoniobacteraceae];g__	3.663e-06	0	1.2583e-05
k__Bacteria;p__Actinobacteria;c__Thermoleophilia;o__Gaiellales;f__Gaiellaceae;g__	2.61253e-06	0.000644942	0
k__Bacteria;p__Proteobacteria;c__Alphaproteobacteria;o__Rhodobacterales;f__Rhodobacteraceae;Other	2.61253e-06	0.00112	0.00038961
k__Bacteria;p__Proteobacteria;c__Alphaproteobacteria;o__Rhodospirillales;f__Rhodospirillaceae;g__Skermanella	2.61253e-06	7.55421e-05	0
k__Bacteria;p__Proteobacteria;c__Gammaproteobacteria;o__Aeromonadales;f__Aeromonadaceae;g__	2.61253e-06	0.000739452	0.000235266
k__Archaea;p__Crenarchaeota;c__Thaumarchaeota;o__Nitrososphaerales;f__Nitrososphaeraceae;g__Candidatus Nitrososphaera	0	3.12108e-05	2.04725e-05
k__Archaea;p__Euryarchaeota;c__Methanobacteria;o__Methanobacteriales;f__Methanobacteriaceae;g__Methanobacterium	0	2.55086e-05	0
k__Archaea;p__Euryarchaeota;c__Methanomicrobia;o__Methanosarcinales;f__Methanosarcinaceae;g__Methanimicrococcus	0	0	4.24881e-05
k__Bacteria;p__Acidobacteria;c__Acidobacteria-5;o__;f__;g__	0	7.1408e-05	0
k__Bacteria;p__Acidobacteria;c__Acidobacteria-6;o__iii1-15;f__;g__	0	0.000458959	0
k__Bacteria;p__Acidobacteria;c__Acidobacteria-6;o__iii1-15;f__RB40;g__	0	5.40063e-05	0
k__Bacteria;p__Acidobacteria;c__Acidobacteria-6;o__iii1-15;f__mb2424;g__	0	0.00010373	0
k__Bacteria;p__Acidobacteria;c__Acidobacteriia;o__Acidobacteriales;f__Acidobacteriaceae;g__	0	1.5066e-05	0
k__Bacteria;p__Acidobacteria;c__Solibacteres;o__Solibacterales;f__;g__	0	4.45513e-05	0
k__Bacteria;p__Acidobacteria;c__Sva0725;o__Sva0725;f__;g__	0	4.47537e-05	0
k__Bacteria;p__Acidobacteria;c__[Chloracidobacteria];o__DS-100;f__;g__	0	4.52564e-05	0
k__Bacteria;p__Acidobacteria;c__iii1-8;o__32-20;f__;g__	0	7.43989e-06	0
k__Bacteria;p__Acidobacteria;c__iii1-8;o__DS-18;f__;g__	0	1.15797e-05	0
k__Bacteria;p__Actinobacteria;c__Acidimicrobiia;o__Acidimicrobiales;Other;Other	0	1.15797e-05	0
k__Bacteria;p__Actinobacteria;c__Acidimicrobiia;o__Acidimicrobiales;f__;g__	0	0.000870958	0.00017135
k__Bacteria;p__Actinobacteria;c__Acidimicrobiia;o__Acidimicrobiales;f__C111;g__	0	0.000385516	0
k__Bacteria;p__Actinobacteria;c__Acidimicrobiia;o__Acidimicrobiales;f__EB1017;g__	0	5.94028e-05	9.15298e-06
k__Bacteria;p__Actinobacteria;c__Acidimicrobiia;o__Acidimicrobiales;f__Iamiaceae;g__Iamia	0	0.000284825	0
k__Bacteria;p__Actinobacteria;c__Acidimicrobiia;o__Acidimicrobiales;f__Microthrixaceae;g__	0	2.33799e-05	0
k__Bacteria;p__Actinobacteria;c__Actinobacteria;o__Actinomycetales;f__Actinomycetaceae;Other	0	0	8.66717e-05
k__Bacteria;p__Actinobacteria;c__Actinobacteria;o__Actinomycetales;f__Actinopolysporaceae;g__Actinopolyspora	0	0	0.000138729
k__Bacteria;p__Actinobacteria;c__Actinobacteria;o__Actinomycetales;f__Actinosynnemataceae;Other	0	0	0.000145907
k__Bacteria;p__Actinobacteria;c__Actinobacteria;o__Actinomycetales;f__Actinosynnemataceae;g__Lentzea	0	2.58997e-05	0
k__Bacteria;p__Actinobacteria;c__Actinobacteria;o__Actinomycetales;f__Cellulomonadaceae;Other	0	0.000259211	3.53392e-06
k__Bacteria;p__Actinobacteria;c__Actinobacteria;o__Actinomycetales;f__Cellulomonadaceae;g__Cellulomonas	0	0.000180507	0
k__Bacteria;p__Actinobacteria;c__Actinobacteria;o__Actinomycetales;f__Dermabacteraceae;Other	0	0.00164889	4.39285e-05
k__Bacteria;p__Actinobacteria;c__Actinobacteria;o__Actinomycetales;f__Dermatophilaceae;g__Dermatophilus	0	0.000345547	0
k__Bacteria;p__Actinobacteria;c__Actinobacteria;o__Actinomycetales;f__Frankiaceae;g__	0	4.21848e-05	1.67538e-05
k__Bacteria;p__Actinobacteria;c__Actinobacteria;o__Actinomycetales;f__Geodermatophilaceae;Other	0	0.00013655	0.000479293
k__Bacteria;p__Actinobacteria;c__Actinobacteria;o__Actinomycetales;f__Geodermatophilaceae;g__	0	9.53392e-05	0.000123764
k__Bacteria;p__Actinobacteria;c__Actinobacteria;o__Actinomycetales;f__Geodermatophilaceae;g__Modestobacter	0	3.1587e-05	0
k__Bacteria;p__Actinobacteria;c__Actinobacteria;o__Actinomycetales;f__Intrasporangiaceae;g__Arsenicicoccus	0	0.00276216	0
k__Bacteria;p__Actinobacteria;c__Actinobacteria;o__Actinomycetales;f__Intrasporangiaceae;g__Phycicoccus	0	0.000442095	0
k__Bacteria;p__Actinobacteria;c__Actinobacteria;o__Actinomycetales;f__Intrasporangiaceae;g__Tetrasphaera	0	0.000448957	0
k__Bacteria;p__Actinobacteria;c__Actinobacteria;o__Actinomycetales;f__Kineosporiaceae;Other	0	0.000549167	0
k__Bacteria;p__Actinobacteria;c__Actinobacteria;o__Actinomycetales;f__Kineosporiaceae;g__Kineococcus	0	0.00024799	0
k__Bacteria;p__Actinobacteria;c__Actinobacteria;o__Actinomycetales;f__Microbacteriaceae;g__Agromyces	0	4.79674e-05	0
k__Bacteria;p__Actinobacteria;c__Actinobacteria;o__Actinomycetales;f__Microbacteriaceae;g__Frigoribacterium	0	0.000235388	0
k__Bacteria;p__Actinobacteria;c__Actinobacteria;o__Actinomycetales;f__Microbacteriaceae;g__Mycetocola	0	0.000309034	0
k__Bacteria;p__Actinobacteria;c__Actinobacteria;o__Actinomycetales;f__Microbacteriaceae;g__Salinibacterium	0	4.59485e-05	0
k__Bacteria;p__Actinobacteria;c__Actinobacteria;o__Actinomycetales;f__Micromonosporaceae;g__	0	9.45157e-05	0
k__Bacteria;p__Actinobacteria;c__Actinobacteria;o__Actinomycetales;f__Micromonosporaceae;g__Actinoplanes	0	0.000207117	0
k__Bacteria;p__Actinobacteria;c__Actinobacteria;o__Actinomycetales;f__Nakamurellaceae;g__	0	0.00086966	0
k__Bacteria;p__Actinobacteria;c__Actinobacteria;o__Actinomycetales;f__Nocardioidaceae;g__Nocardioides	0	0.000255613	4.05219e-05
k__Bacteria;p__Actinobacteria;c__Actinobacteria;o__Actinomycetales;f__Nocardiopsaceae;g__Prauseria	0	5.55924e-05	0
k__Bacteria;p__Actinobacteria;c__Actinobacteria;o__Actinomycetales;f__Propionibacteriaceae;g__Luteococcus	0	0.00169165	0
k__Bacteria;p__Actinobacteria;c__Actinobacteria;o__Actinomycetales;f__Propionibacteriaceae;g__Tessaracoccus	0	5.84543e-05	0
k__Bacteria;p__Actinobacteria;c__Actinobacteria;o__Actinomycetales;f__Pseudonocardiaceae;Other	0	0	0.000196977
k__Bacteria;p__Actinobacteria;c__Actinobacteria;o__Actinomycetales;f__Sporichthyaceae;g__	0	7.75972e-05	0
k__Bacteria;p__Actinobacteria;c__Actinobacteria;o__Actinomycetales;f__Streptomycetaceae;Other	0	3.41792e-05	0
k__Bacteria;p__Actinobacteria;c__Actinobacteria;o__Actinomycetales;f__Streptomycetaceae;g__Streptomyces	0	0	8.10438e-05
k__Bacteria;p__Actinobacteria;c__Actinobacteria;o__Actinomycetales;f__Thermomonosporaceae;g__Actinoallomurus	0	2.06696e-05	0
k__Bacteria;p__Actinobacteria;c__Actinobacteria;o__Actinomycetales;f__Yaniellaceae;g__Yaniella	0	0.000768796	0
k__Bacteria;p__Actinobacteria;c__Actinobacteria;o__Bifidobacteriales;f__Bifidobacteriaceae;g__	0	0.000599571	0
k__Bacteria;p__Actinobacteria;c__Coriobacteriia;o__Coriobacteriales;f__Coriobacteriaceae;g__Adlercreutzia	0	1.73695e-05	0
k__Bacteria;p__Actinobacteria;c__MB-A2-108;o__0319-7L14;f__;g__	0	2.35803e-05	0
k__Bacteria;p__Actinobacteria;c__Thermoleophilia;o__Gaiellales;f__;g__	0	0.000200905	0
k__Bacteria;p__Actinobacteria;c__Thermoleophilia;o__Solirubrobacterales;f__;g__	0	0.000668096	0.000194367
k__Bacteria;p__Actinobacteria;c__Thermoleophilia;o__Solirubrobacterales;f__Conexibacteraceae;g__	0	0.000105044	0
k__Bacteria;p__Actinobacteria;c__Thermoleophilia;o__Solirubrobacterales;f__Patulibacteraceae;g__	0	8.74773e-05	0
k__Bacteria;p__Actinobacteria;c__Thermoleophilia;o__Solirubrobacterales;f__Patulibacteraceae;g__Patulibacter	0	9.36984e-06	0
k__Bacteria;p__Armatimonadetes;c__0319-6E2;o__;f__;g__	0	1.94981e-05	0
k__Bacteria;p__Armatimonadetes;c__Armatimonadia;o__FW68;f__;g__	0	0.000151354	0
k__Bacteria;p__Armatimonadetes;c__SJA-176;o__RB046;f__;g__	0	0	0
k__Bacteria;p__Armatimonadetes;c__[Fimbriimonadia];o__[Fimbriimonadales];f__[Fimbriimonadaceae];g__Fimbriimonas	0	0.000289545	0
k__Bacteria;p__BRC1;c__PRR-11;o__;f__;g__	0	0.000232422	0
k__Bacteria;p__Bacteroidetes;c__Bacteroidia;o__Bacteroidales;f__;g__	0	0.0006539	7.74383e-05
k__Bacteria;p__Bacteroidetes;c__Bacteroidia;o__Bacteroidales;f__Bacteroidaceae;g__	0	0	6.75154e-05
k__Bacteria;p__Bacteroidetes;c__Bacteroidia;o__Bacteroidales;f__Bacteroidaceae;g__5-7N15	0	0.000122974	0
k__Bacteria;p__Bacteroidetes;c__Bacteroidia;o__Bacteroidales;f__GZKB119;g__	0	0	1.71945e-05
k__Bacteria;p__Bacteroidetes;c__Bacteroidia;o__Bacteroidales;f__Porphyromonadaceae;g__	0	3.19153e-06	0
k__Bacteria;p__Bacteroidetes;c__Bacteroidia;o__Bacteroidales;f__RF16;g__	0	0.000375014	0
k__Bacteria;p__Bacteroidetes;c__Bacteroidia;o__Bacteroidales;f__S24-7;g__	0	0.000200863	0
k__Bacteria;p__Bacteroidetes;c__Bacteroidia;o__Bacteroidales;f__[Odoribacteraceae];g__Butyricimonas	0	2.86899e-05	0.000183559
k__Bacteria;p__Bacteroidetes;c__Bacteroidia;o__Bacteroidales;f__[Odoribacteraceae];g__Odoribacter	0	0	3.07688e-05
k__Bacteria;p__Bacteroidetes;c__Bacteroidia;o__Bacteroidales;f__[Paraprevotellaceae];Other	0	4.09644e-05	0
k__Bacteria;p__Bacteroidetes;c__Bacteroidia;o__Bacteroidales;f__[Paraprevotellaceae];g__	0	4.09644e-05	0
k__Bacteria;p__Bacteroidetes;c__Bacteroidia;o__Bacteroidales;f__[Paraprevotellaceae];g__CF231	0	5.98201e-05	0
k__Bacteria;p__Bacteroidetes;c__Bacteroidia;o__Bacteroidales;f__[Paraprevotellaceae];g__Paraprevotella	0	3.8521e-05	0
k__Bacteria;p__Bacteroidetes;c__Bacteroidia;o__Bacteroidales;f__[Paraprevotellaceae];g__YRC22	0	6.41305e-05	0
k__Bacteria;p__Bacteroidetes;c__Cytophagia;o__Cytophagales;f__;g__	0	5.73798e-05	0
k__Bacteria;p__Bacteroidetes;c__Cytophagia;o__Cytophagales;f__Cytophagaceae;g__	0	0.000241138	1.71945e-05
k__Bacteria;p__Bacteroidetes;c__Cytophagia;o__Cytophagales;f__Cytophagaceae;g__Adhaeribacter	0	0.00027809	0
k__Bacteria;p__Bacteroidetes;c__Cytophagia;o__Cytophagales;f__Cytophagaceae;g__Cytophaga	0	2.47507e-05	0
k__Bacteria;p__Bacteroidetes;c__Cytophagia;o__Cytophagales;f__Cytophagaceae;g__Dyadobacter	0	0.00160198	0
k__Bacteria;p__Bacteroidetes;c__Cytophagia;o__Cytophagales;f__Cytophagaceae;g__Emticicia	0	1.54396e-05	0
k__Bacteria;p__Bacteroidetes;c__Cytophagia;o__Cytophagales;f__Cytophagaceae;g__Flectobacillus	0	5.21086e-05	0
k__Bacteria;p__Bacteroidetes;c__Cytophagia;o__Cytophagales;f__Cytophagaceae;g__Larkinella	0	0.000354967	0
k__Bacteria;p__Bacteroidetes;c__Cytophagia;o__Cytophagales;f__Cytophagaceae;g__Leadbetterella	0	6.24878e-05	0
k__Bacteria;p__Bacteroidetes;c__Cytophagia;o__Cytophagales;f__Cytophagaceae;g__Pontibacter	0	1.32004e-05	0
k__Bacteria;p__Bacteroidetes;c__Cytophagia;o__Cytophagales;f__Cytophagaceae;g__Runella	0	1.00308e-05	0
k__Bacteria;p__Bacteroidetes;c__Flavobacteriia;o__Flavobacteriales;f__Flavobacteriaceae;g__Flavobacterium	0	0.00165179	2.86389e-05
k__Bacteria;p__Bacteroidetes;c__Flavobacteriia;o__Flavobacteriales;f__[Weeksellaceae];g__Cloacibacterium	0	0.000978776	0.000139503
k__Bacteria;p__Bacteroidetes;c__Sphingobacteriia;o__Sphingobacteriales;f__Sphingobacteriaceae;g__Pedobacter	0	0.00166324	0
k__Bacteria;p__Bacteroidetes;c__Sphingobacteriia;o__Sphingobacteriales;f__Sphingobacteriaceae;g__Sphingobacterium	0	0.00213094	0.000186092
k__Bacteria;p__Bacteroidetes;c__VC2_1_Bac22;o__;f__;g__	0	3.31452e-05	0
k__Bacteria;p__Bacteroidetes;c__[Rhodothermi];o__[Rhodothermales];f__Rhodothermaceae;g__	0	6.48072e-05	0
k__Bacteria;p__Bacteroidetes;c__[Rhodothermi];o__[Rhodothermales];f__Rhodothermaceae;g__Rubricoccus	0	6.29397e-05	0
k__Bacteria;p__Bacteroidetes;c__[Saprospirae];o__[Saprospirales];f__Chitinophagaceae;Other	0	0.000118725	0
k__Bacteria;p__Bacteroidetes;c__[Saprospirae];o__[Saprospirales];f__Chitinophagaceae;g__	0	0.00308328	5.4653e-05
k__Bacteria;p__Bacteroidetes;c__[Saprospirae];o__[Saprospirales];f__Chitinophagaceae;g__Chitinophaga	0	3.67129e-05	0
k__Bacteria;p__Bacteroidetes;c__[Saprospirae];o__[Saprospirales];f__Chitinophagaceae;g__Flavihumibacter	0	7.86603e-05	0
k__Bacteria;p__Bacteroidetes;c__[Saprospirae];o__[Saprospirales];f__Chitinophagaceae;g__Flavisolibacter	0	0.000245156	0.000164886
k__Bacteria;p__Bacteroidetes;c__[Saprospirae];o__[Saprospirales];f__Chitinophagaceae;g__Niabella	0	0.000486611	0
k__Bacteria;p__Bacteroidetes;c__[Saprospirae];o__[Saprospirales];f__Chitinophagaceae;g__Segetibacter	0	2.50893e-05	0
k__Bacteria;p__Bacteroidetes;c__[Saprospirae];o__[Saprospirales];f__Saprospiraceae;g__	0	0.000131615	0
k__Bacteria;p__Chlamydiae;c__Chlamydiia;o__Chlamydiales;f__Parachlamydiaceae;Other	0	2.50812e-05	0
k__Bacteria;p__Chlamydiae;c__Chlamydiia;o__Chlamydiales;f__Parachlamydiaceae;g__	0	1.20528e-05	0
k__Bacteria;p__Chlamydiae;c__Chlamydiia;o__Chlamydiales;f__Parachlamydiaceae;g__Candidatus Protochlamydia	0	3.11305e-05	0
k__Bacteria;p__Chlamydiae;c__Chlamydiia;o__Chlamydiales;f__Rhabdochlamydiaceae;g__Candidatus Rhabdochlamydia	0	0.00015898	0
k__Bacteria;p__Chlorobi;c__OPB56;o__;f__;g__	0	0.000132187	0
k__Bacteria;p__Chloroflexi;c__Anaerolineae;o__Anaerolineales;f__Anaerolinaceae;g__SHD-231	0	2.90662e-05	0
k__Bacteria;p__Chloroflexi;c__Anaerolineae;o__Ardenscatenales;f__Ardenscatenaceae;g__Ardenscatena	0	6.30198e-05	0
k__Bacteria;p__Chloroflexi;c__Anaerolineae;o__CFB-26;f__;g__	0	2.71188e-05	0
k__Bacteria;p__Chloroflexi;c__Anaerolineae;o__GCA004;f__;g__	0	1.22376e-05	0
k__Bacteria;p__Chloroflexi;c__Anaerolineae;o__H39;f__;g__	0	3.6669e-05	0.000100683
k__Bacteria;p__Chloroflexi;c__Anaerolineae;o__SBR1031;f__SHA-31;g__	0	2.20277e-05	0
k__Bacteria;p__Chloroflexi;c__Anaerolineae;o__SBR1031;f__SJA-101;g__	0	4.89505e-06	0
k__Bacteria;p__Chloroflexi;c__Anaerolineae;o__SBR1031;f__oc28;g__	0	4.49517e-05	0
k__Bacteria;p__Chloroflexi;c__Anaerolineae;o__envOPS12;f__;g__	0	0	0
k__Bacteria;p__Chloroflexi;c__C0119;o__;f__;g__	0	9.94948e-05	0
k__Bacteria;p__Chloroflexi;c__Chloroflexi;o__AKIW781;f__;g__	0	1.62018e-05	0
k__Bacteria;p__Chloroflexi;c__Chloroflexi;o__Chloroflexales;f__FFCH7168;g__	0	8.98258e-05	0
k__Bacteria;p__Chloroflexi;c__Chloroflexi;o__Chloroflexales;f__Oscillochloridaceae;g__Oscillochloris	0	2.27823e-05	0
k__Bacteria;p__Chloroflexi;c__Chloroflexi;o__Herpetosiphonales;f__;g__	0	6.80163e-05	0
k__Bacteria;p__Chloroflexi;c__Chloroflexi;o__[Roseiflexales];f__;g__	0	2.86899e-05	0
k__Bacteria;p__Chloroflexi;c__Chloroflexi;o__[Roseiflexales];f__[Kouleothrixaceae];g__	0	4.55645e-05	0
k__Bacteria;p__Chloroflexi;c__Ellin6529;o__;f__;g__	0	9.48226e-05	0
k__Bacteria;p__Chloroflexi;c__Gitt-GS-136;o__;f__;g__	0	5.1439e-05	0
k__Bacteria;p__Chloroflexi;c__TK17;o__mle1-48;f__;g__	0	7.71979e-06	0
k__Bacteria;p__Cyanobacteria;c__4C0d-2;o__YS2;f__;g__	0	6.41531e-05	0
k__Bacteria;p__Cyanobacteria;c__Chloroplast;o__;f__;g__	0	0.000120194	0
k__Bacteria;p__Cyanobacteria;c__Chloroplast;o__Chlorophyta;f__;g__	0	0.000276627	0
k__Bacteria;p__Cyanobacteria;c__Chloroplast;o__Chlorophyta;f__Chlamydomonadaceae;g__	0	3.3001e-06	0
k__Bacteria;p__Cyanobacteria;c__Chloroplast;o__Chlorophyta;f__Trebouxiophyceae;Other	0	1.02411e-05	0
k__Bacteria;p__Cyanobacteria;c__Chloroplast;o__Chlorophyta;f__Trebouxiophyceae;g__	0	1.43449e-05	0
k__Bacteria;p__Cyanobacteria;c__ML635J-21;o__;f__;g__	0	0.000204707	0
k__Bacteria;p__Cyanobacteria;c__Nostocophycideae;o__Nostocales;f__Nostocaceae;g__Dolichospermum	0	0	0
k__Bacteria;p__Cyanobacteria;c__Nostocophycideae;o__Nostocales;f__Nostocaceae;g__Nostoc	0	2.49123e-05	0
k__Bacteria;p__Cyanobacteria;c__Nostocophycideae;o__Stigonematales;f__Rivulariaceae;g__Calothrix	0	3.3001e-06	0
k__Bacteria;p__Cyanobacteria;c__Oscillatoriophycideae;o__Chroococcales;f__Gomphosphaeriaceae;g__	0	0	0
k__Bacteria;p__Cyanobacteria;c__Oscillatoriophycideae;o__Oscillatoriales;f__Phormidiaceae;g__Phormidium	0	0.000111047	0
k__Bacteria;p__Cyanobacteria;c__Synechococcophycideae;o__Pseudanabaenales;f__Pseudanabaenaceae;Other	0	1.46852e-05	0
k__Bacteria;p__Cyanobacteria;c__Synechococcophycideae;o__Pseudanabaenales;f__Pseudanabaenaceae;g__Leptolyngbya	0	3.9676e-05	0
k__Bacteria;p__Elusimicrobia;c__Elusimicrobia;o__Elusimicrobiales;f__Elusimicrobiaceae;g__	0	7.52678e-05	0
k__Bacteria;p__Elusimicrobia;c__Elusimicrobia;o__IIb;f__;g__	0	1.7374e-05	0
k__Bacteria;p__FBP;c__;o__;f__;g__	0	0.000716817	0.000128249
k__Bacteria;p__Fibrobacteres;c__Fibrobacteria;o__258ds10;f__;g__	0	1.21109e-05	0
k__Bacteria;p__Fibrobacteres;c__Fibrobacteria;o__Fibrobacterales;f__Fibrobacteraceae;g__	0	0	4.37279e-05
k__Bacteria;p__Firmicutes;c__Bacilli;o__Bacillales;Other;Other	0	0	0
k__Bacteria;p__Firmicutes;c__Bacilli;o__Bacillales;f__Paenibacillaceae;g__	0	0.00010429	2.04725e-05
k__Bacteria;p__Firmicutes;c__Bacilli;o__Bacillales;f__Paenibacillaceae;g__Ammoniphilus	0	0.000127404	0
k__Bacteria;p__Firmicutes;c__Bacilli;o__Bacillales;f__Paenibacillaceae;g__Saccharibacillus	0	8.34998e-06	0
k__Bacteria;p__Firmicutes;c__Bacilli;o__Bacillales;f__Planococcaceae;g__Lysinibacillus	0	0	0.000101967
k__Bacteria;p__Firmicutes;c__Bacilli;o__Bacillales;f__Planococcaceae;g__Planomicrobium	0	9.80612e-05	0
k__Bacteria;p__Firmicutes;c__Bacilli;o__Bacillales;f__Planococcaceae;g__Rummeliibacillus	0	1.95802e-05	0
k__Bacteria;p__Firmicutes;c__Bacilli;o__Bacillales;f__Planococcaceae;g__Sporosarcina	0	0	0.000146448
k__Bacteria;p__Firmicutes;c__Bacilli;o__Bacillales;f__Staphylococcaceae;g__Macrococcus	0	7.60726e-05	0
k__Bacteria;p__Firmicutes;c__Bacilli;o__Bacillales;f__Thermoactinomycetaceae;g__Planifilum	0	3.91716e-05	0
k__Bacteria;p__Firmicutes;c__Bacilli;o__Bacillales;f__[Exiguobacteraceae];g__	0	3.18178e-05	0
k__Bacteria;p__Firmicutes;c__Bacilli;o__Bacillales;f__[Thermicanaceae];g__Thermicanus	0	0	1.67538e-05
k__Bacteria;p__Firmicutes;c__Bacilli;o__Lactobacillales;f__Aerococcaceae;g__Alloiococcus	0	0.000725315	0
k__Bacteria;p__Firmicutes;c__Bacilli;o__Lactobacillales;f__Carnobacteriaceae;g__	0	6.37046e-05	0
k__Bacteria;p__Firmicutes;c__Bacilli;o__Lactobacillales;f__Carnobacteriaceae;g__Desemzia	0	0.000290316	0.000118428
k__Bacteria;p__Firmicutes;c__Bacilli;o__Lactobacillales;f__Carnobacteriaceae;g__Trichococcus	0	3.18178e-05	0
k__Bacteria;p__Firmicutes;c__Bacilli;o__Lactobacillales;f__Enterococcaceae;g__Vagococcus	0	0	8.23768e-05
k__Bacteria;p__Firmicutes;c__Bacilli;o__Turicibacterales;f__Turicibacteraceae;g__Turicibacter	0	4.12309e-05	0
k__Bacteria;p__Firmicutes;c__Clostridia;o__Clostridiales;f__Caldicoprobacteraceae;g__Caldicoprobacter	0	0	9.23963e-05
k__Bacteria;p__Firmicutes;c__Clostridia;o__Clostridiales;f__Dehalobacteriaceae;g__Dehalobacterium	0	3.0132e-05	0
k__Bacteria;p__Firmicutes;c__Clostridia;o__Clostridiales;f__EtOH8;g__	0	1.87397e-05	0
k__Bacteria;p__Firmicutes;c__Clostridia;o__Clostridiales;f__Gracilibacteraceae;g__	0	3.00395e-05	0
k__Bacteria;p__Firmicutes;c__Clostridia;o__Clostridiales;f__Lachnospiraceae;g__Anaerostipes	0	3.34715e-05	0
k__Bacteria;p__Firmicutes;c__Clostridia;o__Clostridiales;f__Lachnospiraceae;g__Butyrivibrio	0	0.000150747	0
k__Bacteria;p__Firmicutes;c__Clostridia;o__Clostridiales;f__Lachnospiraceae;g__Dorea	0	0.000146756	0.000113745
k__Bacteria;p__Firmicutes;c__Clostridia;o__Clostridiales;f__Lachnospiraceae;g__Epulopiscium	0	4.63509e-05	0
k__Bacteria;p__Firmicutes;c__Clostridia;o__Clostridiales;f__Lachnospiraceae;g__Moryella	0	0	4.19435e-06
k__Bacteria;p__Firmicutes;c__Clostridia;o__Clostridiales;f__Peptococcaceae;g__	0	1.14895e-05	0
k__Bacteria;p__Firmicutes;c__Clostridia;o__Clostridiales;f__Peptococcaceae;g__Desulfosporosinus	0	2.69228e-05	0
k__Bacteria;p__Firmicutes;c__Clostridia;o__Clostridiales;f__Peptostreptococcaceae;Other	0	0.00264987	1.41627e-05
k__Bacteria;p__Firmicutes;c__Clostridia;o__Clostridiales;f__Peptostreptococcaceae;g__Filifactor	0	0	2.803e-05
k__Bacteria;p__Firmicutes;c__Clostridia;o__Clostridiales;f__Peptostreptococcaceae;g__Peptostreptococcus	0	0.000136899	0
k__Bacteria;p__Firmicutes;c__Clostridia;o__Clostridiales;f__Symbiobacteriaceae;g__Symbiobacterium	0	3.34715e-05	0
k__Bacteria;p__Firmicutes;c__Clostridia;o__Clostridiales;f__Veillonellaceae;g__	0	7.80605e-05	2.83254e-05
k__Bacteria;p__Firmicutes;c__Clostridia;o__Clostridiales;f__Veillonellaceae;g__Sporomusa	0	4.86452e-05	0
k__Bacteria;p__Firmicutes;c__Clostridia;o__Clostridiales;f__[Acidaminobacteraceae];g__Fusibacter	0	4.89505e-06	0
k__Bacteria;p__Firmicutes;c__Clostridia;o__Clostridiales;f__[Tissierellaceae];g__	0	7.83432e-05	0
k__Bacteria;p__Firmicutes;c__Clostridia;o__Clostridiales;f__[Tissierellaceae];g__Helcococcus	0	5.78984e-06	0
k__Bacteria;p__Firmicutes;c__Erysipelotrichi;o__Erysipelotrichales;f__Erysipelotrichaceae;g__Allobaculum	0	0.00023966	0
k__Bacteria;p__Firmicutes;c__Erysipelotrichi;o__Erysipelotrichales;f__Erysipelotrichaceae;g__Bulleidia	0	0.00012718	0
k__Bacteria;p__Firmicutes;c__Erysipelotrichi;o__Erysipelotrichales;f__Erysipelotrichaceae;g__Coprobacillus	0	2.17099e-05	0
k__Bacteria;p__Firmicutes;c__Erysipelotrichi;o__Erysipelotrichales;f__Erysipelotrichaceae;g__Erysipelothrix	0	3.78042e-05	0
k__Bacteria;p__Firmicutes;c__Erysipelotrichi;o__Erysipelotrichales;f__Erysipelotrichaceae;g__L7A_E11	0	7.34258e-06	0
k__Bacteria;p__Firmicutes;c__Erysipelotrichi;o__Erysipelotrichales;f__Erysipelotrichaceae;g__[Eubacterium]	0	0	0
k__Bacteria;p__Firmicutes;c__Erysipelotrichi;o__Erysipelotrichales;f__Erysipelotrichaceae;g__p-75-a5	0	0	3.63936e-05
k__Bacteria;p__Fusobacteria;c__Fusobacteriia;o__Fusobacteriales;f__;g__	0	1.002e-05	0
k__Bacteria;p__Fusobacteria;c__Fusobacteriia;o__Fusobacteriales;f__Leptotrichiaceae;g__Sneathia	0	0	1.06018e-05
k__Bacteria;p__Gemmatimonadetes;c__Gemm-1;o__;f__;g__	0	0.000157642	0
k__Bacteria;p__Gemmatimonadetes;c__Gemm-3;o__;f__;g__	0	1.70353e-05	8.3887e-06
k__Bacteria;p__Gemmatimonadetes;c__Gemm-5;o__;f__;g__	0	5.27991e-05	0
k__Bacteria;p__Gemmatimonadetes;c__Gemmatimonadetes;o__;f__;g__	0	8.1009e-06	0
k__Bacteria;p__Gemmatimonadetes;c__Gemmatimonadetes;o__Ellin5290;f__;g__	0	4.47182e-05	0
k__Bacteria;p__Gemmatimonadetes;c__Gemmatimonadetes;o__Gemmatimonadales;f__;g__	0	3.42654e-05	0
k__Bacteria;p__Gemmatimonadetes;c__Gemmatimonadetes;o__Gemmatimonadales;f__Gemmatimonadaceae;g__Gemmatimonas	0	0.000163714	0
k__Bacteria;p__Gemmatimonadetes;c__Gemmatimonadetes;o__N1423WL;f__;g__	0	1.91266e-05	0
k__Bacteria;p__Planctomycetes;c__C6;o__d113;f__;g__	0	1.71327e-05	0
k__Bacteria;p__Planctomycetes;c__OM190;o__agg27;f__;g__	0	1.69553e-05	0
k__Bacteria;p__Planctomycetes;c__Planctomycetia;o__Gemmatales;f__Isosphaeraceae;g__	0	0.000264635	0
k__Bacteria;p__Planctomycetes;c__Planctomycetia;o__Pirellulales;f__Pirellulaceae;g__	0	0.000283494	4.18845e-05
k__Bacteria;p__Planctomycetes;c__Planctomycetia;o__Pirellulales;f__Pirellulaceae;g__A17	0	2.86899e-05	0
k__Bacteria;p__Planctomycetes;c__Planctomycetia;o__Pirellulales;f__Pirellulaceae;g__Pirellula	0	2.42218e-05	0
k__Bacteria;p__Planctomycetes;c__Planctomycetia;o__Planctomycetales;f__Planctomycetaceae;g__Planctomyces	0	0.00014742	0
k__Bacteria;p__Planctomycetes;c__vadinHA49;o__PeHg47;f__;g__	0	0	5.60601e-05
k__Bacteria;p__Proteobacteria;c__Alphaproteobacteria;o__BD7-3;f__;g__	0	0.000427998	0
k__Bacteria;p__Proteobacteria;c__Alphaproteobacteria;o__Caulobacterales;f__Caulobacteraceae;Other	0	0	0
k__Bacteria;p__Proteobacteria;c__Alphaproteobacteria;o__Caulobacterales;f__Caulobacteraceae;g__Asticcacaulis	0	8.39196e-05	0
k__Bacteria;p__Proteobacteria;c__Alphaproteobacteria;o__Caulobacterales;f__Caulobacteraceae;g__Mycoplana	0	0.00018828	0
k__Bacteria;p__Proteobacteria;c__Alphaproteobacteria;o__Caulobacterales;f__Caulobacteraceae;g__Phenylobacterium	0	0.00014512	0
k__Bacteria;p__Proteobacteria;c__Alphaproteobacteria;o__Ellin329;f__;g__	0	4.30348e-05	0
k__Bacteria;p__Proteobacteria;c__Alphaproteobacteria;o__Rhizobiales;Other;Other	0	0.00062833	2.46669e-05
k__Bacteria;p__Proteobacteria;c__Alphaproteobacteria;o__Rhizobiales;f__Beijerinckiaceae;g__	0	0.000736495	6.36459e-05
k__Bacteria;p__Proteobacteria;c__Alphaproteobacteria;o__Rhizobiales;f__Bradyrhizobiaceae;Other	0	6.29767e-05	2.04725e-05
k__Bacteria;p__Proteobacteria;c__Alphaproteobacteria;o__Rhizobiales;f__Bradyrhizobiaceae;g__Balneimonas	0	3.61584e-05	0
k__Bacteria;p__Proteobacteria;c__Alphaproteobacteria;o__Rhizobiales;f__Bradyrhizobiaceae;g__Bosea	0	1.53214e-05	0
k__Bacteria;p__Proteobacteria;c__Alphaproteobacteria;o__Rhizobiales;f__Bradyrhizobiaceae;g__Bradyrhizobium	0	0.000225001	0
k__Bacteria;p__Proteobacteria;c__Alphaproteobacteria;o__Rhizobiales;f__Hyphomicrobiaceae;g__	0	7.91262e-05	0
k__Bacteria;p__Proteobacteria;c__Alphaproteobacteria;o__Rhizobiales;f__Hyphomicrobiaceae;g__Hyphomicrobium	0	0.00040229	1.2583e-05
k__Bacteria;p__Proteobacteria;c__Alphaproteobacteria;o__Rhizobiales;f__Hyphomicrobiaceae;g__Pedomicrobium	0	2.7003e-05	0
k__Bacteria;p__Proteobacteria;c__Alphaproteobacteria;o__Rhizobiales;f__Hyphomicrobiaceae;g__Rhodoplanes	0	0.000525317	5.02614e-05
k__Bacteria;p__Proteobacteria;c__Alphaproteobacteria;o__Rhizobiales;f__Methylobacteriaceae;g__Methylobacterium	0	0.00133686	0.000483629
k__Bacteria;p__Proteobacteria;c__Alphaproteobacteria;o__Rhizobiales;f__Methylocystaceae;Other	0	2.10924e-05	0
k__Bacteria;p__Proteobacteria;c__Alphaproteobacteria;o__Rhizobiales;f__Phyllobacteriaceae;Other	0	5.0121e-05	2.51307e-05
k__Bacteria;p__Proteobacteria;c__Alphaproteobacteria;o__Rhizobiales;f__Phyllobacteriaceae;g__Mesorhizobium	0	0.000714439	2.0261e-05
k__Bacteria;p__Proteobacteria;c__Alphaproteobacteria;o__Rhizobiales;f__Rhizobiaceae;Other	0	0.000280834	0
k__Bacteria;p__Proteobacteria;c__Alphaproteobacteria;o__Rhizobiales;f__Xanthobacteraceae;g__	0	0.000221624	0
k__Bacteria;p__Proteobacteria;c__Alphaproteobacteria;o__Rhizobiales;f__Xanthobacteraceae;g__Labrys	0	0.000163841	0
k__Bacteria;p__Proteobacteria;c__Alphaproteobacteria;o__Rhodobacterales;f__Hyphomonadaceae;g__	0	7.4713e-05	0
k__Bacteria;p__Proteobacteria;c__Alphaproteobacteria;o__Rhodobacterales;f__Rhodobacteraceae;g__Amaricoccus	0	0.000480945	2.803e-05
k__Bacteria;p__Proteobacteria;c__Alphaproteobacteria;o__Rhodobacterales;f__Rhodobacteraceae;g__Anaerospora	0	0.000131321	0
k__Bacteria;p__Proteobacteria;c__Alphaproteobacteria;o__Rhodospirillales;f__;g__	0	0.000250869	0
k__Bacteria;p__Proteobacteria;c__Alphaproteobacteria;o__Rhodospirillales;f__Acetobacteraceae;g__	0	0.00121728	0.00052342
k__Bacteria;p__Proteobacteria;c__Alphaproteobacteria;o__Rhodospirillales;f__Acetobacteraceae;g__Roseomonas	0	0.000400978	0.0014366
k__Bacteria;p__Proteobacteria;c__Alphaproteobacteria;o__Rhodospirillales;f__Rhodospirillaceae;g__	0	0.000477977	0
k__Bacteria;p__Proteobacteria;c__Alphaproteobacteria;o__Rhodospirillales;f__Rhodospirillaceae;g__Novispirillum	0	7.19523e-05	0
k__Bacteria;p__Proteobacteria;c__Alphaproteobacteria;o__Rickettsiales;f__Pelagibacteraceae;g__	0	0	5.66508e-05
k__Bacteria;p__Proteobacteria;c__Alphaproteobacteria;o__Rickettsiales;f__Rickettsiaceae;g__Wolbachia	0	0	0
k__Bacteria;p__Proteobacteria;c__Alphaproteobacteria;o__Rickettsiales;f__mitochondria;g__	0	4.29983e-05	0
k__Bacteria;p__Proteobacteria;c__Alphaproteobacteria;o__Rickettsiales;f__mitochondria;g__Acanthamoeba	0	1.35096e-05	0
k__Bacteria;p__Proteobacteria;c__Alphaproteobacteria;o__Sphingomonadales;f__Erythrobacteraceae;Other	0	7.51777e-05	0
k__Bacteria;p__Proteobacteria;c__Alphaproteobacteria;o__Sphingomonadales;f__Erythrobacteraceae;g__Citromicrobium	0	0	5.66508e-05
k__Bacteria;p__Proteobacteria;c__Alphaproteobacteria;o__Sphingomonadales;f__Sphingomonadaceae;g__Kaistobacter	0	0.000561107	6.3321e-05
k__Bacteria;p__Proteobacteria;c__Alphaproteobacteria;o__Sphingomonadales;f__Sphingomonadaceae;g__Novosphingobium	0	0.000205677	0.000125976
k__Bacteria;p__Proteobacteria;c__Alphaproteobacteria;o__Sphingomonadales;f__Sphingomonadaceae;g__Sphingobium	0	0.00125031	0
k__Bacteria;p__Proteobacteria;c__Betaproteobacteria;Other;Other;Other	0	0.00388317	3.63858e-05
k__Bacteria;p__Proteobacteria;c__Betaproteobacteria;o__ASSO-13;f__;g__	0	0.000110258	0
k__Bacteria;p__Proteobacteria;c__Betaproteobacteria;o__Burkholderiales;f__;g__	0	8.88122e-05	0
k__Bacteria;p__Proteobacteria;c__Betaproteobacteria;o__Burkholderiales;f__Alcaligenaceae;g__	0	0	3.35076e-05
k__Bacteria;p__Proteobacteria;c__Betaproteobacteria;o__Burkholderiales;f__Burkholderiaceae;g__	0	0.000108908	0
k__Bacteria;p__Proteobacteria;c__Betaproteobacteria;o__Burkholderiales;f__Burkholderiaceae;g__Burkholderia	0	0.000104644	0.000109836
k__Bacteria;p__Proteobacteria;c__Betaproteobacteria;o__Burkholderiales;f__Comamonadaceae;g__Azohydromonas	0	0.000114146	0
k__Bacteria;p__Proteobacteria;c__Betaproteobacteria;o__Burkholderiales;f__Comamonadaceae;g__Methylibium	0	0.000128436	0
k__Bacteria;p__Proteobacteria;c__Betaproteobacteria;o__Burkholderiales;f__Comamonadaceae;g__Polaromonas	0	0.00106683	0
k__Bacteria;p__Proteobacteria;c__Betaproteobacteria;o__Burkholderiales;f__Comamonadaceae;g__Rubrivivax	0	0.000106691	0
k__Bacteria;p__Proteobacteria;c__Betaproteobacteria;o__Burkholderiales;f__Comamonadaceae;g__Tepidimonas	0	3.17273e-05	1.06018e-05
k__Bacteria;p__Proteobacteria;c__Betaproteobacteria;o__Burkholderiales;f__Oxalobacteraceae;g__Polynucleobacter	0	0	0
k__Bacteria;p__Proteobacteria;c__Betaproteobacteria;o__Burkholderiales;f__Oxalobacteraceae;g__Ralstonia	0	0.000418722	4.36381e-05
k__Bacteria;p__Proteobacteria;c__Betaproteobacteria;o__Ellin6067;f__;g__	0	0.000165791	0
k__Bacteria;p__Proteobacteria;c__Betaproteobacteria;o__Gallionellales;f__Gallionellaceae;g__Gallionella	0	0	0
k__Bacteria;p__Proteobacteria;c__Betaproteobacteria;o__Hydrogenophilales;f__Hydrogenophilaceae;g__Thiobacillus	0	0.000100146	0
k__Bacteria;p__Proteobacteria;c__Betaproteobacteria;o__Methylophilales;f__Methylophilaceae;g__	0	0.000123731	0
k__Bacteria;p__Proteobacteria;c__Betaproteobacteria;o__Methylophilales;f__Methylophilaceae;g__Methylotenera	0	4.84176e-05	0
k__Bacteria;p__Proteobacteria;c__Betaproteobacteria;o__Nitrosomonadales;f__Nitrosomonadaceae;g__	0	0	0
k__Bacteria;p__Proteobacteria;c__Betaproteobacteria;o__Procabacteriales;f__Procabacteriaceae;g__	0	0.00010087	0
k__Bacteria;p__Proteobacteria;c__Betaproteobacteria;o__Rhodocyclales;f__Rhodocyclaceae;g__Propionivibrio	0	5.57967e-05	0
k__Bacteria;p__Proteobacteria;c__Betaproteobacteria;o__Rhodocyclales;f__Rhodocyclaceae;g__Zoogloea	0	0.000346868	0
k__Bacteria;p__Proteobacteria;c__Betaproteobacteria;o__SC-I-84;f__;g__	0	0.000245583	9.15298e-06
k__Bacteria;p__Proteobacteria;c__Deltaproteobacteria;o__Bdellovibrionales;f__Bdellovibrionaceae;g__Bdellovibrio	0	0.000123813	0
k__Bacteria;p__Proteobacteria;c__Deltaproteobacteria;o__Desulfovibrionales;f__Desulfovibrionaceae;g__	0	0	0.000247205
k__Bacteria;p__Proteobacteria;c__Deltaproteobacteria;o__Desulfovibrionales;f__Desulfovibrionaceae;g__Desulfovibrio	0	0.000413903	0
k__Bacteria;p__Proteobacteria;c__Deltaproteobacteria;o__Desulfuromonadales;f__Geobacteraceae;g__	0	6.40069e-05	0
k__Bacteria;p__Proteobacteria;c__Deltaproteobacteria;o__Desulfuromonadales;f__Geobacteraceae;g__Geobacter	0	7.96847e-05	0
k__Bacteria;p__Proteobacteria;c__Deltaproteobacteria;o__GMD14H09;f__;g__	0	3.32836e-05	0
k__Bacteria;p__Proteobacteria;c__Deltaproteobacteria;o__MIZ46;f__;g__	0	0.00014179	0
k__Bacteria;p__Proteobacteria;c__Deltaproteobacteria;o__Myxococcales;f__;g__	0	0.0013371	8.3887e-06
k__Bacteria;p__Proteobacteria;c__Deltaproteobacteria;o__Myxococcales;f__0319-6G20;g__	0	0	0
k__Bacteria;p__Proteobacteria;c__Deltaproteobacteria;o__Myxococcales;f__Cystobacterineae;g__	0	0.000135376	0
k__Bacteria;p__Proteobacteria;c__Deltaproteobacteria;o__Myxococcales;f__Haliangiaceae;g__	0	0.000611198	0
k__Bacteria;p__Proteobacteria;c__Deltaproteobacteria;o__Myxococcales;f__Haliangiaceae;g__Haliangium	0	5.15909e-05	0
k__Bacteria;p__Proteobacteria;c__Deltaproteobacteria;o__Myxococcales;f__Myxococcaceae;g__	0	1.21109e-05	0
k__Bacteria;p__Proteobacteria;c__Deltaproteobacteria;o__Myxococcales;f__Nannocystaceae;g__Plesiocystis	0	7.14712e-05	0
k__Bacteria;p__Proteobacteria;c__Deltaproteobacteria;o__Myxococcales;f__Polyangiaceae;Other	0	3.33395e-05	0
k__Bacteria;p__Proteobacteria;c__Deltaproteobacteria;o__Myxococcales;f__Polyangiaceae;g__Chondromyces	0	9.83922e-05	0
k__Bacteria;p__Proteobacteria;c__Deltaproteobacteria;o__Myxococcales;f__Polyangiaceae;g__Sorangium	0	2.20277e-05	0
k__Bacteria;p__Proteobacteria;c__Deltaproteobacteria;o__Spirobacillales;f__;g__	0	0.00014898	0
k__Bacteria;p__Proteobacteria;c__Deltaproteobacteria;o__Syntrophobacterales;f__Syntrophobacteraceae;g__	0	6.59525e-05	0
k__Bacteria;p__Proteobacteria;c__Epsilonproteobacteria;o__Campylobacterales;f__Campylobacteraceae;g__Arcobacter	0	0.0143559	0
k__Bacteria;p__Proteobacteria;c__Epsilonproteobacteria;o__Campylobacterales;f__Campylobacteraceae;g__Sulfurospirillum	0	9.97872e-05	0
k__Bacteria;p__Proteobacteria;c__Epsilonproteobacteria;o__Campylobacterales;f__Helicobacteraceae;g__	0	0.00436265	0
k__Bacteria;p__Proteobacteria;c__Epsilonproteobacteria;o__Campylobacterales;f__Helicobacteraceae;g__Helicobacter	0	0	0.00011212
k__Bacteria;p__Proteobacteria;c__Epsilonproteobacteria;o__Campylobacterales;f__Helicobacteraceae;g__Sulfuricurvum	0	0.000928764	0
k__Bacteria;p__Proteobacteria;c__Gammaproteobacteria;o__34P16;f__;g__	0	2.23197e-05	0
k__Bacteria;p__Proteobacteria;c__Gammaproteobacteria;o__Aeromonadales;f__Aeromonadaceae;g__Tolumonas	0	0.000112314	0
k__Bacteria;p__Proteobacteria;c__Gammaproteobacteria;o__Alteromonadales;f__OM60;g__	0	2.6644e-05	0
k__Bacteria;p__Proteobacteria;c__Gammaproteobacteria;o__Chromatiales;f__;g__	0	1.35015e-05	0
k__Bacteria;p__Proteobacteria;c__Gammaproteobacteria;o__Legionellales;f__Coxiellaceae;g__	0	0	0
k__Bacteria;p__Proteobacteria;c__Gammaproteobacteria;o__Legionellales;f__Legionellaceae;g__	0	5.78984e-06	8.3887e-06
k__Bacteria;p__Proteobacteria;c__Gammaproteobacteria;o__Legionellales;f__Legionellaceae;g__Legionella	0	7.28818e-06	0
k__Bacteria;p__Proteobacteria;c__Gammaproteobacteria;o__Methylococcales;f__Crenotrichaceae;g__Crenothrix	0	0	0
k__Bacteria;p__Proteobacteria;c__Gammaproteobacteria;o__Oceanospirillales;f__Halomonadaceae;g__	0	0	0
k__Bacteria;p__Proteobacteria;c__Gammaproteobacteria;o__Pasteurellales;f__Pasteurellaceae;g__Chelonobacter	0	0	0
k__Bacteria;p__Proteobacteria;c__Gammaproteobacteria;o__Pseudomonadales;f__Moraxellaceae;Other	0	1.82204e-05	0
k__Bacteria;p__Proteobacteria;c__Gammaproteobacteria;o__Pseudomonadales;f__Moraxellaceae;g__Alkanindiges	0	6.37046e-05	0
k__Bacteria;p__Proteobacteria;c__Gammaproteobacteria;o__Pseudomonadales;f__Moraxellaceae;g__Psychrobacter	0	6.93036e-05	1.41357e-05
k__Bacteria;p__Proteobacteria;c__Gammaproteobacteria;o__Thiotrichales;f__Piscirickettsiaceae;g__	0	1.91266e-05	0
k__Bacteria;p__Proteobacteria;c__Gammaproteobacteria;o__Vibrionales;f__Pseudoalteromonadaceae;Other	0	0.000108384	0
k__Bacteria;p__Proteobacteria;c__Gammaproteobacteria;o__Xanthomonadales;f__Sinobacteraceae;g__Nevskia	0	1.69553e-05	0
k__Bacteria;p__Proteobacteria;c__Gammaproteobacteria;o__Xanthomonadales;f__Sinobacteraceae;g__Steroidobacter	0	3.39105e-05	0
k__Bacteria;p__Proteobacteria;c__Gammaproteobacteria;o__Xanthomonadales;f__Xanthomonadaceae;Other	0	0.000773331	0
k__Bacteria;p__Proteobacteria;c__Gammaproteobacteria;o__Xanthomonadales;f__Xanthomonadaceae;g__Arenimonas	0	0.000107182	2.82713e-05
k__Bacteria;p__Proteobacteria;c__Gammaproteobacteria;o__Xanthomonadales;f__Xanthomonadaceae;g__Dokdonella	0	9.14157e-05	0
k__Bacteria;p__Proteobacteria;c__Gammaproteobacteria;o__Xanthomonadales;f__Xanthomonadaceae;g__Lysobacter	0	4.21848e-05	0
k__Bacteria;p__Proteobacteria;c__Gammaproteobacteria;o__Xanthomonadales;f__Xanthomonadaceae;g__Pseudoxanthomonas	0	0.00106376	1.41357e-05
k__Bacteria;p__Proteobacteria;c__TA18;o__PHOS-HD29;f__;g__	0	0	0
k__Bacteria;p__Spirochaetes;c__Spirochaetes;o__Sphaerochaetales;f__Sphaerochaetaceae;g__Sphaerochaeta	0	5.01786e-05	0
k__Bacteria;p__Spirochaetes;c__Spirochaetes;o__Spirochaetales;f__Spirochaetaceae;g__Spirochaeta	0	1.08012e-05	0
k__Bacteria;p__Synergistetes;c__Synergistia;o__Synergistales;f__Dethiosulfovibrionaceae;g__Pyramidobacter	0	4.11771e-05	0
k__Bacteria;p__TM6;c__SJA-4;o__;f__;g__	0	2.55323e-06	0
k__Bacteria;p__TM7;c__MJK10;o__;f__;g__	0	1.45331e-05	0
k__Bacteria;p__TM7;c__SC3;o__;f__;g__	0	1.15827e-05	0
k__Bacteria;p__TM7;c__TM7-1;o__;f__;g__	0	0.000238124	3.35076e-05
k__Bacteria;p__TM7;c__TM7-3;o__CW040;f__F16;g__	0	0.000103869	0
k__Bacteria;p__TM7;c__TM7-3;o__EW055;f__;g__	0	0.000319589	0
k__Bacteria;p__TM7;c__TM7-3;o__I025;f__;g__	0	0.000120902	0
k__Bacteria;p__TM7;c__TM7-3;o__I025;f__Rs-045;g__	0	0.000594543	0
k__Bacteria;p__Tenericutes;c__Mollicutes;o__Anaeroplasmatales;f__Anaeroplasmataceae;g__Anaeroplasma	0	0	0.000322864
k__Bacteria;p__Tenericutes;c__Mollicutes;o__Mycoplasmatales;f__Mycoplasmataceae;g__Ureaplasma	0	0	1.67774e-05
k__Bacteria;p__Tenericutes;c__Mollicutes;o__RsaHF231;f__;g__	0	0	5.9529e-05
k__Bacteria;p__Tenericutes;c__RF3;o__ML615J-28;f__;g__	0	2.55323e-06	9.36662e-05
k__Bacteria;p__Verrucomicrobia;c__Opitutae;o__Opitutales;f__Opitutaceae;g__Opitutus	0	3.79532e-05	1.41357e-05
k__Bacteria;p__Verrucomicrobia;c__Opitutae;o__[Cerasicoccales];f__[Cerasicoccaceae];g__	0	0	0
k__Bacteria;p__Verrucomicrobia;c__Verruco-5;o__WCHB1-41;f__WCHB1-25;g__	0	4.89505e-06	4.11884e-05
k__Bacteria;p__Verrucomicrobia;c__Verrucomicrobiae;o__Verrucomicrobiales;f__Verrucomicrobiaceae;g__	0	0.00018764	0
k__Bacteria;p__Verrucomicrobia;c__Verrucomicrobiae;o__Verrucomicrobiales;f__Verrucomicrobiaceae;g__Luteolibacter	0	4.54543e-05	0
k__Bacteria;p__Verrucomicrobia;c__[Pedosphaerae];o__[Pedosphaerales];f__auto67_4W;g__	0	3.0132e-05	0
k__Bacteria;p__Verrucomicrobia;c__[Spartobacteria];o__[Chthoniobacterales];f__01D2Z36;g__	0	8.34998e-06	0
k__Bacteria;p__Verrucomicrobia;c__[Spartobacteria];o__[Chthoniobacterales];f__[Chthoniobacteraceae];g__Candidatus Xiphinematobacter	0	7.71979e-06	0.000137295
k__Bacteria;p__Verrucomicrobia;c__[Spartobacteria];o__[Chthoniobacterales];f__[Chthoniobacteraceae];g__Chthoniobacter	0	7.39097e-05	0
k__Bacteria;p__Verrucomicrobia;c__[Spartobacteria];o__[Chthoniobacterales];f__[Chthoniobacteraceae];g__Ellin506	0	4.17499e-05	0
k__Bacteria;p__[Thermi];c__Deinococci;o__Deinococcales;f__Deinococcaceae;g__Deinococcus	0	0.00472344	9.3639e-05
k__Bacteria;p__[Thermi];c__Deinococci;o__Deinococcales;f__Trueperaceae;g__Truepera	0	0.000420452	0.000284164
k__Bacteria;p__[Thermi];c__Deinococci;o__Thermales;f__Thermaceae;g__Meiothermus	0	4.75909e-05	1.67774e-05
k__Bacteria;p__[Thermi];c__Deinococci;o__Thermales;f__Thermaceae;g__Thermus	0	0	2.06919e-05
